# Supplementary material
Source: PubMed Central journal article supplement (PMC7566626)
Supplement: jiaa130_suppl_supplementary_material.pdf [file jiaa130_suppl_supplementary_material.pdf]

## SUPPLEMENTARY APPENDIX

### Ending the HIV epidemic among persons who inject drugs: a cost-effectiveness analysis in six U.S. cities

Emanuel Krebs [1], Xiao Zang [1,2], Benjamin Enns [1], Jeong E Min [1], Czarina N Behrends [3], Carlos Del Rio [4], Julia C Dombrowski [5], Daniel J Feaster [6], Kelly A Gebo [7], Brandon DL Marshall [8], Shruti H Mehta [9], Lisa R Metsch [10], Ankur Pandya [11], Bruce R Schackman [3], Steffanie A Strathdee [12], Bohdan Nosyk [1,2] **on behalf of the localized economic modeling study group.**

---

1. BC Centre for Excellence in HIV/AIDS; Vancouver, British Columbia, Canada. 2. Faculty of Health Sciences, Simon Fraser University; Vancouver, British Columbia, Canada; 3. Department of Healthcare Policy and Research, Weill Cornell Medical College, New York City, New York, United States; 4. Rollins School of Public Health and Emory University School of Medicine, Atlanta, Georgia, United States; 5. Department of Medicine, Division of Allergy and Infectious Disease, University of Washington, Seattle, Washington, United States; 6. Department of Public Health Sciences, Leonard M. Miller School of Medicine, University of Miami, Miami, Florida, United States; 7. School of Medicine, Bloomberg School of Public Health, Johns Hopkins University, Baltimore, Maryland, United States; 8. School of Public Health, Brown University, Providence, Rhode Island, United States; 9. Department of Epidemiology, Bloomberg School of Public Health, Johns Hopkins University, Baltimore, Maryland, United States; 10. Department of Sociomedical Sciences, Mailman School of Public Health, Columbia University, New York City, New York, United States; 11. Department of Health Policy and Management, Harvard T.H. Chan School of Public Health, Boston, Massachusetts, United States; 12. School of Medicine, University of California San Diego, La Jolla, California, United States.

## 1. Cost-Effectiveness Analysis & Results

Complete cost-effectiveness results for individual interventions and for the combination implementation strategies on the production function for each city in the optimistic scenario are presented in **Supplemental Tables 1 and Supplemental Figure 1**.

## 2. Sensitivity Analysis

### 2.1 Changing opioid epidemic mortality details

Within each city, we implemented an increased risk of mortality for PWID who were not receiving medication for opioid use disorders (MOUD). We derived the elevated risk of mortality among PWID from estimates in British Columbia, Canada where fentanyl saturation in the illicit drug supply is among the highest in North America [1]. We adjusted mortality estimates for each city using state-level evidence of fentanyl prevalence: 0-1.00 encounters per 100,000 residents in California (LA); 1.01-5.00 in Florida (Miami); 0-1.00 in Georgia (Atlanta); 5.01-10.00 in Maryland (Baltimore); 1.01-5.00 in New York (NYC); 0-1.00 in Washington (Seattle) [2]. In comparison, the highest prevalence states of Massachusetts and New Hampshire reported over 20 encounters per 100,000 residents [2]. We assumed that the elevated mortality risk in British Columbia represented the mortality risk in the highest prevalence states, and adjusted rates downward for other cities accordingly. Fentanyl prevalence was only reported in ranges; therefore, we used high, midpoint and low estimates for each city. Full results are presented in **Supplemental Figures 2 & 3**.

| Increased Mortality Risk <sup>†</sup> |          |      |      |
|---------------------------------------|----------|------|------|
|                                       | Midpoint | Low  | High |
| <b>Atlanta</b>                        | 1.02     | 1.00 | 1.03 |
| <b>Baltimore</b>                      | 1.23     | 1.16 | 1.31 |
| <b>Los Angeles</b>                    | 1.02     | 1.00 | 1.03 |
| <b>Miami</b>                          | 1.09     | 1.03 | 1.16 |
| <b>New York</b>                       | 1.09     | 1.03 | 1.16 |
| <b>Seattle</b>                        | 1.02     | 1.00 | 1.03 |

<sup>†</sup> Increased mortality risk adjusted down from 1.625[1] according to state-level fentanyl saturation[2]

### 2.2 Free PrEP details

We conducted deterministic sensitivity analysis on our results under the assumption of free PrEP provision (i.e. zero PrEP medication costs), in response to the announcement by Gilead Sciences of free PrEP provision for 200,000 HIV-negative individuals for five years [3]. Despite this donation, questions remain as to whether it will close the treatment gap for the people most in

need, relative to allowing generic manufacturing and provision of PrEP [4]. We retained implementation and sustainment costs for PrEP scale-up, as the donation of PrEP was assumed to only cover the direct costs of medication, and not overhead, labour, or other costs related to PrEP delivery. Full results are presented in **Supplemental Figures 4 & 5**.

### **3. Additional information**

We have published elsewhere the description of the model, the evidence synthesis and the estimation of status quo service levels, the ranges for the scale-up and costs attributable to each intervention (including costs of implementation, delivery and sustainment, when applicable) and modeling assumptions for all interventions included in our study [5-10]. For simplicity, we provide some of these details for the HIV prevention programs hereafter (cost information can be found in **Supplemental Table 2**). Interventions excluded from combinations are presented in **Supplemental Figure 6**.

Conforming to best practice guidelines on cost-effectiveness analyses [11], **Supplemental Tables 3 and 4** report the Impact Inventory and the Consolidated Health Economic Evaluation Reporting Standards (CHEERS) checklist.

#### **3.1 Syringe Service Programs**

In the model, expanded access to sterile injection equipment provided by SSP reduces the number of shared injections by 58% (95% CI: 19%, 78%). [12] We note that the probability of transmission is reduced by 50% when the HIV-infected sharing partner is on ART or when the HIV-uninfected partner is on PrEP [9].

Status quo volume of syringes distributed from syringe service programs (SSP) varied greatly across city (from 5,185 per 1,000 PWID in ATL to 204,404 per 1,000 PWID in SEA) [6], and we assumed that syringes were distributed proportionally across PWID ethnic groups. We identified the best available evidence for Atlanta based on estimates from the Atlanta Harm Reduction Coalition in 2016 [13]. Estimates for Baltimore were based on the City of Baltimore Syringe Exchange Program in 2016 [14]. Estimates for Los Angeles were based on direct correspondence with the City of Los Angeles AIDS Coordinator's Office for Los Angeles [15]. Estimates for Miami were based on national CDC estimates, as local surveillance estimates were not available [16]. Estimates for New York City were based on New York state department of health reports in 2012 [17]. Estimates for Seattle were based on direct correspondence with Public Health – Seattle & King County for Seattle [18].

The optimistic scenario was defined according to WHO guidelines on good coverage for PWID and allowed for 200 syringes/PWID/year [19]. Since status quo coverage levels for Seattle are already equivalent to this scenario, we assumed 400 syringes/PWID/year.

Costs per syringe were derived from a CDC-led study and included the costs attributable to syringes as well as overhead and personnel costs while implementation costs consisted of start-up costs [20].

### **3.2 Medication for opioid use disorder**

Access to MOUD for the 73% of PWID estimated to have an opioid use disorder [21] reduced the number of shared injections by 54% (95% CI: 33%, 68%) resulting in a reduced probability of HIV acquisition [22]. In addition, given the protective effect of MOUD in reducing overdose and other injected-related risk of death [23], PWID receiving MOUD had a reduced risk of mortality (66%; 95% CI: 48%, 78%) [23] and an increased quality of life (6%; 95% CI: 0%, 13%) [24]. Finally, MOUD also decreased the probability of ART discontinuation (34%; 95% CI: 11%, 51%) [25].

As practical considerations will often determine medication selection (e.g., access to opioid treatment programs for treatment with methadone or insurance coverage for buprenorphine) [26], we considered evidence specific to each medication. To derive status quo service levels for PWID receiving buprenorphine, we estimated DATA-waivered physician capacity accepting Medicaid for each city [6]. Estimates for receipt of methadone were derived from state-level data stratified by gender and race/ethnicity available from the Substance Abuse and Mental Health Services Administration (SAMHSA), and we adjusted for the state's proportion of opioid treatment programs situated within each city's boundaries [6].

The range for the rate of expanded access was derived using evidence of the annual rate of increase between 2011-2014 in city-level PWID receiving opioid treatment program-based MOUD with methadone from SAMHSA's latest complete Treatment Episode Data Set (TEDS) [6, 27]. The optimistic rate of expanded access was derived from the annual growth rate (16.7%) in Seattle (from 930 to 1,714).

The optimistic scenario for expanded access to office-based MOUD with buprenorphine for PWID was defined according to WHO guidelines on good coverage for PWID [19], and given the more limited expansion capacity of treatment with methadone in opioid treatment programs [28], we assumed 40% coverage of treatment with buprenorphine among PWID with an OUD.

Costs for MOUD included medication, toxicology and overhead costs, as well as intervention-specific implementation costs unique to each treatment, including physician detailing costs for office-based buprenorphine expansion, and clinic-level training/process improvement for opioid treatment program-based methadone expansion [7].

### **3.3 Pre-exposure prophylaxis**

Expanded access to daily PrEP for all PWID resulted in a reduced probability of HIV infection via sexual contact and shared injection equipment of 60% (95% CI: 56%, 62%) [6]. We derived population-level average PrEP effectiveness by multiplying the efficacy of taking four doses per week (96%; 95% CI: 90%, 99%) [29] by the percentage of individuals that had PrEP adherence equivalent to four doses per week (62.5%) in a cohort study evaluating adherence when PrEP was provided free of charge in community-based clinics [30]. We assumed that individuals on PrEP were tested for HIV every 3 months, as per CDC guidelines [31].

Given the paucity of evidence on PrEP uptake among PWID, we assumed no PrEP among PWID in the status quo and that expanded access in the optimistic scenarios would result in a coverage level of 50%.

Costs for PrEP included medication costs (accounting for financial support provided by the Gilead Advancing Access program), HIV testing costs and time for physician consultations [7, 32]. Implementation costs included provider outreach and detailing to increase physician capacity for the prescription of PrEP [7].

## ATLANTA

### Supplement Table 1. Panel A. Results of incremental cost-effectiveness analysis for combination implementation strategies comprising Atlanta's health production function

| <b>Atlanta</b>  |                              |                          |                        |
|-----------------|------------------------------|--------------------------|------------------------|
| <i>Strategy</i> | <i>Incremental Cost: \$M</i> | <i>Incremental QALYs</i> | <i>ICER: \$ / QALY</i> |
| 1               | 0.0                          | 0                        | -                      |
| 2               | 0.1                          | 23                       | 4,649                  |
| 3               | 6.6                          | 381                      | 18,224                 |
| 4               | 7.1                          | 396                      | 28,670                 |
| 5               | 464.6                        | 15,627                   | 30,039                 |
| 6               | 477.3                        | 15,803                   | 72,056                 |
| <b>7</b>        | <b>503.3</b>                 | <b>16,013</b>            | <b>124,165</b>         |
| 8               | 545.3                        | 16,257                   | 171,961                |
| 9               | 586.5                        | 16,484                   | 181,576                |
| 10              | 590.1                        | 16,497                   | 266,883                |
| 11              | 606.2                        | 16,549                   | 313,350                |
| 12              | 609.5                        | 16,555                   | 573,045                |
| 13              | 2834.6                       | 17,051                   | 4,482,135              |

\$B: billions of \$US; \$M: millions of \$US (both in 2018 \$US); QALYs: quality-adjusted life years; ICER: incremental cost-effectiveness ratio; CS: cost-saving. Each of the strategies 1 through 10 represent the highest-valued strategies for a given investment level. Incremental costs and QALYs are compared against the next-most-costly strategy on the production function (i.e. Strategy 2 versus 1, 3 versus 2 etc.).

**ATLANTA**

**Supplement Table 1. Panel B. Combination implementation strategies, delivered at optimistic implementation scale-up, residing on Atlanta’s health production function**

|                                |                               | Health-maximizing combination |        |        |        |        |        |        |          |                    |                    |                    |                    |                    |
|--------------------------------|-------------------------------|-------------------------------|--------|--------|--------|--------|--------|--------|----------|--------------------|--------------------|--------------------|--------------------|--------------------|
| Strategy                       |                               | 1                             | 2      | 3      | 4      | 5      | 6      | 7      | 8        | 9                  | 10                 | 11                 | 12                 | 13                 |
| <b>HIV Prevention Programs</b> | Syringe service program       | Expand                        | Expand | Expand | Expand | Expand | Expand | Expand | Maintain | Not Cost-Effective |
|                                | MOUD with buprenorphine       | Expand                        | Expand | Expand | Expand | Expand | Expand | Expand | Maintain | Not Cost-Effective |
|                                | MOUD with methadone           | Expand                        | Expand | Expand | Expand | Expand | Expand | Expand | Maintain | Not Cost-Effective |
|                                | PrEP for PWID and MSMWID      | Expand                        | Expand | Expand | Expand | Expand | Expand | Expand | Maintain | Not Cost-Effective |
| <b>HIV Testing</b>             | EMR testing offer reminder    | Expand                        | Expand | Expand | Expand | Expand | Expand | Expand | Maintain | Not Cost-Effective |
|                                | Nurse-initiated rapid testing | Expand                        | Expand | Expand | Expand | Expand | Expand | Expand | Maintain | Not Cost-Effective |
|                                | MOUD integrated rapid testing | Expand                        | Expand | Expand | Expand | Expand | Expand | Expand | Maintain | Not Cost-Effective |
| <b>ART Engagement</b>          | Case management (ARTAS)       | Expand                        | Expand | Expand | Expand | Expand | Expand | Expand | Maintain | Not Cost-Effective |
|                                | Care coordination             | Expand                        | Expand | Expand | Expand | Expand | Expand | Expand | Maintain | Not Cost-Effective |
|                                | Targeted care coordination    | Expand                        | Expand | Expand | Expand | Expand | Expand | Expand | Maintain | Not Cost-Effective |
|                                | EMR ART engagement reminder   | Expand                        | Expand | Expand | Expand | Expand | Expand | Expand | Maintain | Not Cost-Effective |
|                                | RAPID ART initiation          | Expand                        | Expand | Expand | Expand | Expand | Expand | Expand | Maintain | Not Cost-Effective |
| <b>ART Re-Engagement</b>       | Enhanced person contact       | Expand                        | Expand | Expand | Expand | Expand | Expand | Expand | Maintain | Not Cost-Effective |
|                                | Re-linkage program            | Expand                        | Expand | Expand | Expand | Expand | Expand | Expand | Maintain | Not Cost-Effective |

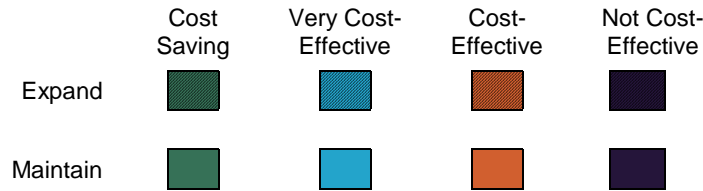

QALY – Quality adjusted life year; ICER – Incremental cost-effectiveness ratio; MOUD – Medication for opioid use disorder; PrEP – Pre-exposure prophylaxis; MSM – men who have sex with men; EMR – Electronic medical record; ARTAS – Anti-Retroviral Treatment and Access to Services; ART – Antiretroviral therapy; RAPID – Rapid ART Program for Individuals with an HIV Diagnosis.

† The health-maximizing strategy that remained cost-effective was determined by calculating the incremental cost-effectiveness ratio, defined as the additional cost of a specific combination implementation strategy divided by its additional health benefit, as compared with the next-most-costly strategy on the health production function. Combination implementation strategies with ICERs less than \$50,000/QALY were considered very cost-effective, while those with ICERs < \$150,000/QALY were considered cost-effective. The numerator represents the total increment in healthcare costs (in 2018 US\$) for the adult population (aged 15-64) in a given city, and the denominator represents the total gain in quality-adjusted life years for this group.

## ATLANTA

**Supplement Table 1. Panel C. Incremental costs, QALYs and incremental cost-effectiveness ratios (ICER) of individual interventions**

| Intervention                   | Atlanta                  |                       |                         |
|--------------------------------|--------------------------|-----------------------|-------------------------|
|                                | $\Delta TC$ (\$M)        | $\Delta QALYs$        | ICER (\$'000s)          |
| <i>HIV prevention programs</i> |                          |                       |                         |
| Syringe service program        | 12.2 [-372.6 - 146.6]    | 320 [-186 - 1731]     | 38.1 [CS - 1460.7]      |
| MOUD with buprenorphine        | 458.2 [211.7 - 1114.7]   | 15152 [10374 - 20390] | 30.2 [13.8 - 81.7]      |
| MOUD with methadone            | 0.4 [-140.6 - 136.1]     | 15 [-493 - 561]       | 28.6 [CS - 218.6]       |
| PrEP for PWID and MSMWID       | 2175.6 [1458.6 - 2606.7] | 825 [308 - 3508]      | 2636.1 [409.1 - 5988.9] |
| <i>HIV Testing</i>             |                          |                       |                         |
| EMR testing offer reminder     | 6.5 [-162.3 - 134.6]     | 363 [-58 - 1522]      | 18.0 [CS - 1190.1]      |
| Nurse-initiated rapid testing  | 11.0 [-150.8 - 138.4]    | 267 [-131 - 1389]     | 41.4 [CS - 1367.9]      |
| MOUD integrated rapid testing  | 0.1 [-141.6 - 134.8]     | 23 [-480 - 581]       | 4.6 [CS - 376.9]        |
| <i>ART engagement</i>          |                          |                       |                         |
| Case management (ARTAS)        | 15.3 [-118.9 - 161.8]    | 46 [-452 - 605]       | 334.9 [CS - 2180.1]     |
| Care coordination              | 19.2 [-117.3 - 161.8]    | 20 [-482 - 568]       | 952.3 [CS - 1253.4]     |
| Targeted care coordination     | 3.8 [-135.9 - 139.1]     | 16 [-486 - 565]       | 231.8 [CS - 351.4]      |
| EMR ART engagement reminder    | 43.5 [-106.4 - 183.5]    | 250 [-251 - 871]      | 174.5 [CS - 2209.5]     |
| RAPID ART initiation           | 3.7 [-136.0 - 139.7]     | 7 [-496 - 561]        | 555.4 [CS - 295.0]      |
| <i>ART re-engagement</i>       |                          |                       |                         |
| Enhanced personal contact      | 27.0 [-114.3 - 163.0]    | 158 [-337 - 749]      | 171.5 [CS - 2061.2]     |
| Re-linkage program             | 16.9 [-127.6 - 154.1]    | 101 [-388 - 684]      | 167.0 [CS - 1826.7]     |

\* Values represent the results obtained from the deterministic analysis and the 95% credible interval in brackets from the probabilistic sensitivity analysis over 2,000 simulations.

QALY: Quality-adjusted life years; TC: Total costs; CS: Cost-saving; PWID: People who inject drugs; MSM: Men who have sex with men; PrEP: Pre-exposure prophylaxis; MOUD: Medication for opioid use disorder; ART: Antiretroviral therapy; EMR: Electronic medical records; RAPID: Rapid ART Program for Individuals with an HIV Diagnosis.



## **BALTIMORE**

### **Supplement Table 1. Panel A. Results of incremental cost-effectiveness analysis for combination implementation strategies comprising Baltimore's health production function**

| <b>Baltimore</b> |                              |                          |                        |
|------------------|------------------------------|--------------------------|------------------------|
| <i>Strategy</i>  | <i>Incremental Cost: \$M</i> | <i>Incremental QALYs</i> | <i>ICER: \$ / QALY</i> |
| 1                | -9.4                         | 331                      | CS                     |
| 2                | 14.2                         | 902                      | 41,378                 |
| 3                | 474.1                        | 10,442                   | 48,201                 |
| 4                | 507.2                        | 10,711                   | 123,123                |
| 5                | 512.3                        | 10,752                   | 125,340                |
| 6                | 515.3                        | 10,775                   | 133,011                |
| <b>7</b>         | <b>555.5</b>                 | <b>11,075</b>            | <b>133,625</b>         |
| 8                | 556.7                        | 11,083                   | 164,865                |
| 9                | 653.8                        | 11,171                   | 1,097,114              |
| 10               | 3135.6                       | 11,667                   | 5,010,583              |

\$B: billions of \$US; \$M: millions of \$US (both in 2018 \$US); QALYs: quality-adjusted life years; ICER: incremental cost-effectiveness ratio; CS: cost-saving. Each of the strategies 1 through 8 represent the highest-valued strategies for a given investment level. Incremental costs and QALYs are compared against the next-most-costly strategy on the production function (i.e. Strategy 2 versus 1, 3 versus 2 etc.).

**BALTIMORE**

**Supplement Table 1. Panel B. Combination implementation strategies, delivered at optimistic implementation scale-up, residing on Baltimore’s health production function**

|                                |                               | Health-maximizing combination |        |          |                     |                |                |                |                |                    |                    |                    |
|--------------------------------|-------------------------------|-------------------------------|--------|----------|---------------------|----------------|----------------|----------------|----------------|--------------------|--------------------|--------------------|
|                                |                               | Combination                   | 1      | 2        | 3                   | 4              | 5              | 6              | 7              | 8                  | 9                  | 10                 |
| <b>HIV Prevention Programs</b> | Syringe service program       |                               | Expand | Maintain | Maintain            | Cost-Effective | Cost-Effective | Cost-Effective | Cost-Effective | Not Cost-Effective | Not Cost-Effective | Not Cost-Effective |
|                                | MOUD with buprenorphine       |                               | Expand | Maintain | Very Cost-Effective | Cost-Effective | Cost-Effective | Cost-Effective | Cost-Effective | Not Cost-Effective | Not Cost-Effective | Not Cost-Effective |
|                                | MOUD with methadone           |                               | Expand | Maintain | Very Cost-Effective | Cost-Effective | Cost-Effective | Cost-Effective | Cost-Effective | Not Cost-Effective | Not Cost-Effective | Not Cost-Effective |
|                                | PrEP for PWID and MSMWID      |                               | Expand | Maintain | Maintain            | Cost-Effective | Cost-Effective | Cost-Effective | Cost-Effective | Not Cost-Effective | Not Cost-Effective | Not Cost-Effective |
| <b>HIV Testing</b>             | EMR testing offer reminder    |                               | Expand | Maintain | Maintain            | Cost-Effective | Cost-Effective | Cost-Effective | Cost-Effective | Not Cost-Effective | Not Cost-Effective | Not Cost-Effective |
|                                | Nurse-initiated rapid testing |                               | Expand | Maintain | Maintain            | Cost-Effective | Cost-Effective | Cost-Effective | Cost-Effective | Not Cost-Effective | Not Cost-Effective | Not Cost-Effective |
|                                | MOUD integrated rapid testing |                               | Expand | Maintain | Maintain            | Cost-Effective | Cost-Effective | Cost-Effective | Cost-Effective | Not Cost-Effective | Not Cost-Effective | Not Cost-Effective |
| <b>ART Engagement</b>          | Case management (ARTAS)       |                               | Expand | Maintain | Maintain            | Cost-Effective | Cost-Effective | Cost-Effective | Cost-Effective | Not Cost-Effective | Not Cost-Effective | Not Cost-Effective |
|                                | Care coordination             |                               | Expand | Maintain | Maintain            | Cost-Effective | Cost-Effective | Cost-Effective | Cost-Effective | Not Cost-Effective | Not Cost-Effective | Not Cost-Effective |
|                                | Targeted care coordination    |                               | Expand | Maintain | Maintain            | Cost-Effective | Cost-Effective | Cost-Effective | Cost-Effective | Not Cost-Effective | Not Cost-Effective | Not Cost-Effective |
|                                | EMR ART engagement reminder   |                               | Expand | Maintain | Maintain            | Cost-Effective | Cost-Effective | Cost-Effective | Cost-Effective | Not Cost-Effective | Not Cost-Effective | Not Cost-Effective |
| <b>ART Re-Engagement</b>       | RAPID ART initiation          |                               | Expand | Maintain | Maintain            | Cost-Effective | Cost-Effective | Cost-Effective | Cost-Effective | Not Cost-Effective | Not Cost-Effective | Not Cost-Effective |
|                                | Enhanced person contact       |                               | Expand | Maintain | Maintain            | Cost-Effective | Cost-Effective | Cost-Effective | Cost-Effective | Not Cost-Effective | Not Cost-Effective | Not Cost-Effective |
|                                | Re-linkage program            |                               | Expand | Maintain | Maintain            | Cost-Effective | Cost-Effective | Cost-Effective | Cost-Effective | Not Cost-Effective | Not Cost-Effective | Not Cost-Effective |

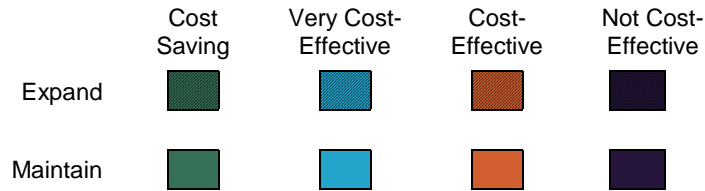

QALY – Quality adjusted life year; ICER – Incremental cost-effectiveness ratio; MOUD – Medication for opioid use disorder; PrEP – Pre-exposure prophylaxis; MSM – men who have sex with men; EMR – Electronic medical record; ARTAS – Anti-Retroviral Treatment and Access to Services; ART – Antiretroviral therapy; RAPID – Rapid ART Program for Individuals with an HIV Diagnosis.

† The health-maximizing strategy that remained cost-effective was determined by calculating the incremental cost-effectiveness ratio, defined as the additional cost of a specific combination implementation strategy divided by its additional health benefit, as compared with the next-most-costly strategy on the health production function. Combination implementation strategies with ICERs less than \$50,000/QALY were considered very cost-effective, while those with ICERs < \$150,000/QALY were considered cost-effective. The numerator represents the total increment in healthcare costs (in 2018 US\$) for the adult population (aged 15-64) in a given city, and the denominator represents the total gain in quality-adjusted life years for this group.

## **BALTIMORE**

**Supplement Table 1. Panel C. Incremental costs, QALYs and incremental cost-effectiveness ratios (ICER) of individual interventions**

| <b>Intervention</b>            | <b>Baltimore</b>         |                     |                          |
|--------------------------------|--------------------------|---------------------|--------------------------|
|                                | $\Delta TC$ (\$M)        | $\Delta QALYs$      | ICER (\$'000s)           |
| <i>HIV prevention programs</i> |                          |                     |                          |
| Syringe service program        | 96.2 [-5.8 - 203.0]      | 126 [-257 - 495]    | 762.7 [CS - 4918.6]      |
| MOUD with buprenorphine        | 462.6 [285.9 - 1140.4]   | 9457 [5248 - 14281] | 48.9 [29.1 - 147.7]      |
| MOUD with methadone            | 23.7 [-64.2 - 138.3]     | 570 [165 - 1030]    | 41.6 [CS - 666.4]        |
| PrEP for PWID and MSMWID       | 2474.9 [2036.7 - 3018.6] | 632 [119 - 918]     | 3917.3 [2421.1 - 8783.6] |
| <i>HIV Testing</i>             |                          |                     |                          |
| EMR testing offer reminder     | -4.6 [-101.4 - 101.8]    | 169 [-216 - 496]    | CS [CS - 2153.4]         |
| Nurse-initiated rapid testing  | -5.0 [-103.7 - 98.4]     | 164 [-204 - 518]    | CS [CS - 1782.7]         |
| MOUD integrated rapid testing  | -0.5 [-97.7 - 103.9]     | 22 [-347 - 361]     | CS [CS - 238.2]          |
| <i>ART engagement</i>          |                          |                     |                          |
| Case management (ARTAS)        | 3.0 [-92.8 - 108.4]      | 19 [-351 - 354]     | 159.4 [CS - 506.2]       |
| Care coordination              | 17.6 [-75.5 - 126.0]     | 40 [-336 - 376]     | 437.8 [CS - 2176.1]      |
| Targeted care coordination     | 5.5 [-91.5 - 110.5]      | 44 [-326 - 385]     | 123.3 [CS - 1111.1]      |
| EMR ART engagement reminder    | 45.2 [-59.3 - 149.5]     | 339 [-117 - 710]    | 133.2 [CS - 1790.8]      |
| RAPID ART initiation           | 1.3 [-95.9 - 106.0]      | 7 [-363 - 341]      | 187.2 [CS - 52.1]        |
| <i>ART re-engagement</i>       |                          |                     |                          |
| Enhanced personal contact      | 21.7 [-77.2 - 125.6]     | 173 [-230 - 526]    | 125.3 [CS - 2520.2]      |
| Re-linkage program             | 13.9 [-83.0 - 117.6]     | 111 [-260 - 464]    | 125.0 [CS - 2064.8]      |

\* Values represent the results obtained from the deterministic analysis and the 95% credible interval in brackets from the probabilistic sensitivity analysis over 2,000 simulations.

QALY: Quality-adjusted life years; TC: Total costs; CS: Cost-saving; PWID: People who inject drugs; MSM: Men who have sex with men; PrEP: Pre-exposure prophylaxis; MOUD: Medication for opioid use disorder; ART: Antiretroviral therapy; EMR: Electronic medical records; RAPID: Rapid ART Program for Individuals with an HIV Diagnosis.

## LOS ANGELES

### Supplement Table 1. Panel A. Results of incremental cost-effectiveness analysis for combination implementation strategies comprising Los Angeles's health production function

| <b>Los Angeles</b> |                              |                          |                        |
|--------------------|------------------------------|--------------------------|------------------------|
| <i>Strategy</i>    | <i>Incremental Cost: \$M</i> | <i>Incremental QALYs</i> | <i>ICER: \$ / QALY</i> |
| 1                  | -3.8                         | 201                      | CS                     |
| 2                  | -2.6                         | 811                      | CS                     |
| 3                  | 9.4                          | 1,993                    | 10,092                 |
| 4                  | 74.0                         | 4,246                    | 28,685                 |
| 5                  | 562.3                        | 20,429                   | 30,174                 |
| 6                  | 592.8                        | 21,407                   | 31,244                 |
| 7                  | 606.6                        | 21,714                   | 44,764                 |
| 8                  | 650.6                        | 22,226                   | 85,936                 |
| <b>9</b>           | <b>714.0</b>                 | <b>22,900</b>            | <b>94,069</b>          |
| 10                 | 719.8                        | 22,939                   | 150,777                |
| 11                 | 738.1                        | 23,039                   | 182,050                |
| 12                 | 746.1                        | 23,065                   | 310,134                |
| 13                 | 3435.3                       | 25,214                   | 1,251,625              |

\$B: billions of \$US; \$M: millions of \$US (both in 2018 \$US); QALYs: quality-adjusted life years; ICER: incremental cost-effectiveness ratio; CS: cost-saving. Each of the strategies 1 through 8 represent the highest-valued strategies for a given investment level. Incremental costs and QALYs are compared against the next-most-costly strategy on the production function (i.e. Strategy 2 versus 1, 3 versus 2 etc.).

**LOS ANGELES**

**Supplement Table 1. Panel B. Combination implementation strategies, delivered at optimistic implementation scale-up, residing on Los Angeles’s health production function**

|                                |                               | Health-maximizing combination |        |          |          |          |          |          |          |                |                |                    |                    |                    |
|--------------------------------|-------------------------------|-------------------------------|--------|----------|----------|----------|----------|----------|----------|----------------|----------------|--------------------|--------------------|--------------------|
| Strategy                       |                               | 1                             | 2      | 3        | 4        | 5        | 6        | 7        | 8        | 9              | 10             | 11                 | 12                 | 13                 |
| <b>HIV Prevention Programs</b> | Syringe service program       | Expand                        | Expand | Maintain | Maintain | Maintain | Maintain | Maintain | Maintain | Cost-Effective | Cost-Effective | Not Cost-Effective | Not Cost-Effective | Not Cost-Effective |
|                                | MOUD with buprenorphine       | Expand                        | Expand | Maintain | Maintain | Maintain | Maintain | Maintain | Maintain | Cost-Effective | Cost-Effective | Not Cost-Effective | Not Cost-Effective | Not Cost-Effective |
|                                | MOUD with methadone           | Expand                        | Expand | Maintain | Maintain | Maintain | Maintain | Maintain | Maintain | Cost-Effective | Cost-Effective | Not Cost-Effective | Not Cost-Effective | Not Cost-Effective |
|                                | PrEP for PWID and MSMWID      | Expand                        | Expand | Maintain | Maintain | Maintain | Maintain | Maintain | Maintain | Cost-Effective | Cost-Effective | Not Cost-Effective | Not Cost-Effective | Not Cost-Effective |
| <b>HIV Testing</b>             | EMR testing offer reminder    | Expand                        | Expand | Maintain | Maintain | Maintain | Maintain | Maintain | Maintain | Cost-Effective | Cost-Effective | Not Cost-Effective | Not Cost-Effective | Not Cost-Effective |
|                                | Nurse-initiated rapid testing | Expand                        | Expand | Maintain | Maintain | Maintain | Maintain | Maintain | Maintain | Cost-Effective | Cost-Effective | Not Cost-Effective | Not Cost-Effective | Not Cost-Effective |
|                                | MOUD integrated rapid testing | Expand                        | Expand | Maintain | Maintain | Maintain | Maintain | Maintain | Maintain | Cost-Effective | Cost-Effective | Not Cost-Effective | Not Cost-Effective | Not Cost-Effective |
| <b>ART Engagement</b>          | Case management (ARTAS)       | Expand                        | Expand | Maintain | Maintain | Maintain | Maintain | Maintain | Maintain | Cost-Effective | Cost-Effective | Not Cost-Effective | Not Cost-Effective | Not Cost-Effective |
|                                | Care coordination             | Expand                        | Expand | Maintain | Maintain | Maintain | Maintain | Maintain | Maintain | Cost-Effective | Cost-Effective | Not Cost-Effective | Not Cost-Effective | Not Cost-Effective |
|                                | Targeted care coordination    | Expand                        | Expand | Maintain | Maintain | Maintain | Maintain | Maintain | Maintain | Cost-Effective | Cost-Effective | Not Cost-Effective | Not Cost-Effective | Not Cost-Effective |
|                                | EMR ART engagement reminder   | Expand                        | Expand | Maintain | Maintain | Maintain | Maintain | Maintain | Maintain | Cost-Effective | Cost-Effective | Not Cost-Effective | Not Cost-Effective | Not Cost-Effective |
|                                | RAPID ART initiation          | Expand                        | Expand | Maintain | Maintain | Maintain | Maintain | Maintain | Maintain | Cost-Effective | Cost-Effective | Not Cost-Effective | Not Cost-Effective | Not Cost-Effective |
| <b>ART Re-Engagement</b>       | Enhanced person contact       | Expand                        | Expand | Maintain | Maintain | Maintain | Maintain | Maintain | Maintain | Cost-Effective | Cost-Effective | Not Cost-Effective | Not Cost-Effective | Not Cost-Effective |
|                                | Re-linkage program            | Expand                        | Expand | Maintain | Maintain | Maintain | Maintain | Maintain | Maintain | Cost-Effective | Cost-Effective | Not Cost-Effective | Not Cost-Effective | Not Cost-Effective |

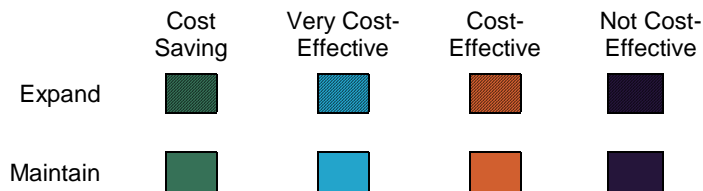

QALY – Quality adjusted life year; ICER – Incremental cost-effectiveness ratio; MOUD – Medication for opioid use disorder; PrEP – Pre-exposure prophylaxis; MSM – men who have sex with men; EMR – Electronic medical record; ARTAS – Anti-Retroviral Treatment and Access to Services; ART – Antiretroviral therapy; RAPID – Rapid ART Program for Individuals with an HIV Diagnosis.

† The health-maximizing strategy that remained cost-effective was determined by calculating the incremental cost-effectiveness ratio, defined as the additional cost of a specific combination implementation strategy divided by its additional health benefit, as compared with the next-most-costly strategy on the health production function. Combination implementation strategies with ICERs less than \$50,000/QALY were considered very cost-effective, while those with ICERs < \$150,000/QALY were considered cost-effective. The numerator represents the total increment in healthcare costs (in 2018 US\$) for the adult population (aged 15-64) in a given city, and the denominator represents the total gain in quality-adjusted life years for this group.

## LOS ANGELES

**Supplement Table 1. Panel C. Incremental costs, QALYs and incremental cost-effectiveness ratios (ICER) of individual interventions**

| Intervention                   | Los Angeles              |                       |                        |
|--------------------------------|--------------------------|-----------------------|------------------------|
|                                | $\Delta TC$ (\$M)        | $\Delta QALYs$        | ICER (\$'000s)         |
| <i>HIV prevention programs</i> |                          |                       |                        |
| Syringe service program        | 8.0 [-97.3 - 137.7]      | 1270 [-165 - 2434]    | 6.3 [CS - 653.1]       |
| MOUD with buprenorphine        | 499.0 [327.1 - 1284.0]   | 17057 [11199 - 22684] | 29.3 [19.6 - 82.3]     |
| MOUD with methadone            | 62.5 [1.4 - 179.2]       | 2258 [1127 - 3332]    | 27.7 [0.5 - 136.3]     |
| PrEP for PWID and MSMWID       | 2605.2 [2165.4 - 3274.3] | 3227 [1306 - 4256]    | 807.4 [574.7 - 2202.6] |
| <i>HIV Testing</i>             |                          |                       |                        |
| EMR testing offer reminder     | 0.4 [-81.6 - 65.6]       | 658 [-296 - 1595]     | 0.7 [CS - 318.7]       |
| Nurse-initiated rapid testing  | 4.1 [-85.4 - 67.9]       | 598 [-276 - 1705]     | 6.9 [CS - 395.0]       |
| MOUD integrated rapid testing  | -3.8 [-72.1 - 58.9]      | 201 [-659 - 1082]     | CS [CS - 286.0]        |
| <i>ART engagement</i>          |                          |                       |                        |
| Case management (ARTAS)        | 17.1 [-47.8 - 88.6]      | 90 [-794 - 981]       | 190.8 [CS - 953.5]     |
| Care coordination              | 30.1 [-33.0 - 104.8]     | 60 [-805 - 957]       | 500.5 [CS - 1991.8]    |
| Targeted care coordination     | 6.2 [-61.3 - 71.4]       | 48 [-814 - 946]       | 130.2 [CS - 390.6]     |
| EMR ART engagement reminder    | 66.0 [-22.7 - 142.6]     | 756 [-307 - 1604]     | 87.4 [CS - 959.0]      |
| RAPID ART initiation           | 8.8 [-61.1 - 73.9]       | 31 [-821 - 923]       | 284.8 [CS - 465.6]     |
| <i>ART re-engagement</i>       |                          |                       |                        |
| Enhanced personal contact      | 28.1 [-40.3 - 96.4]      | 334 [-588 - 1202]     | 84.0 [CS - 1186.2]     |
| Re-linkage program             | 17.2 [-48.9 - 84.4]      | 213 [-694 - 1099]     | 80.5 [CS - 893.3]      |

\* Values represent the results obtained from the deterministic analysis and the 95% credible interval in brackets from the probabilistic sensitivity analysis over 2,000 simulations.

QALY: Quality-adjusted life years; TC: Total costs; CS: Cost-saving; PWID: People who inject drugs; MSM: Men who have sex with men; PrEP: Pre-exposure prophylaxis; MOUD: Medication for opioid use disorder; ART: Antiretroviral therapy; EMR: Electronic medical records; RAPID: Rapid ART Program for Individuals with an HIV Diagnosis.

## MIAMI

### Supplement Table 1. Panel A. Results of incremental cost-effectiveness analysis for combination implementation strategies comprising Miami's health production function

| <b>Miami</b>    |                              |                          |                        |
|-----------------|------------------------------|--------------------------|------------------------|
| <i>Strategy</i> | <i>Incremental Cost: \$M</i> | <i>Incremental QALYs</i> | <i>ICER: \$ / QALY</i> |
| 1               | -237.2                       | 5,273                    | CS                     |
| 2               | -235.1                       | 5,367                    | CS                     |
| 3               | -48.1                        | 13,314                   | CS                     |
| 4               | -17.2                        | 13,773                   | CS                     |
| 5               | 21.0                         | 14,314                   | 70,652                 |
| 6               | 25.2                         | 14,355                   | 104,079                |
| 7               | 48.4                         | 14,551                   | 118,613                |
| <b>8</b>        | <b>643.3</b>                 | <b>18,618</b>            | <b>146,256</b>         |
| 9               | 649.2                        | 18,647                   | 204,299                |

\$B: billions of \$US; \$M: millions of \$US (both in 2018 \$US); QALYs: quality-adjusted life years; ICER: incremental cost-effectiveness ratio; CS: cost-saving. Each of the strategies 1 through 8 represent the highest-valued strategies for a given investment level. Incremental costs and QALYs are compared against the next-most-costly strategy on the production function (i.e. Strategy 2 versus 1, 3 versus 2 etc.).

**MIAMI**

**Supplement Table 1. Panel B. Combination implementation strategies, delivered at optimistic implementation scale-up, residing on Miami’s health production function**

|                                |                               | Health-maximizing combination |   |   |   |   |   |   |   |   |
|--------------------------------|-------------------------------|-------------------------------|---|---|---|---|---|---|---|---|
| Strategy                       |                               | 1                             | 2 | 3 | 4 | 5 | 6 | 7 | 8 | 9 |
| <b>HIV Prevention Programs</b> | Syringe service program       |                               |   |   |   |   |   |   |   |   |
|                                | MOUD with buprenorphine       |                               |   |   |   |   |   |   |   |   |
|                                | MOUD with methadone           |                               |   |   |   |   |   |   |   |   |
|                                | PrEP for PWID and MSMWID      |                               |   |   |   |   |   |   |   |   |
| <b>HIV Testing</b>             | EMR testing offer reminder    |                               |   |   |   |   |   |   |   |   |
|                                | Nurse-initiated rapid testing |                               |   |   |   |   |   |   |   |   |
|                                | MOUD integrated rapid testing |                               |   |   |   |   |   |   |   |   |
| <b>ART Engagement</b>          | Case management (ARTAS)       |                               |   |   |   |   |   |   |   |   |
|                                | Care coordination             |                               |   |   |   |   |   |   |   |   |
|                                | Targeted care coordination    |                               |   |   |   |   |   |   |   |   |
|                                | EMR ART engagement reminder   |                               |   |   |   |   |   |   |   |   |
|                                | RAPID ART initiation          |                               |   |   |   |   |   |   |   |   |
| <b>ART Re-Engagement</b>       | Enhanced person contact       |                               |   |   |   |   |   |   |   |   |
|                                | Re-linkage program            |                               |   |   |   |   |   |   |   |   |

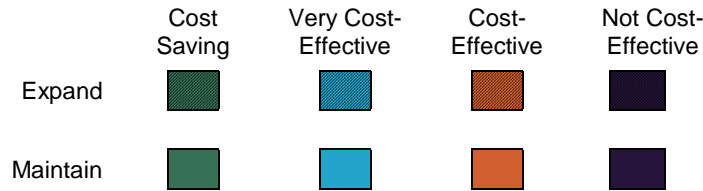

QALY – Quality adjusted life year; ICER – Incremental cost-effectiveness ratio; MOUD – Medication for opioid use disorder; PrEP – Pre-exposure prophylaxis; MSM – men who have sex with men; EMR – Electronic medical record; ARTAS – Anti-Retroviral Treatment and Access to Services; ART – Antiretroviral therapy; RAPID – Rapid ART Program for Individuals with an HIV Diagnosis.

† The health-maximizing strategy that remained cost-effective was determined by calculating the incremental cost-effectiveness ratio, defined as the additional cost of a specific combination implementation strategy divided by its additional health benefit, as compared with the next-most-costly strategy on the health production function. Combination implementation strategies with ICERs less than \$50,000/QALY were considered very cost-effective, while those with ICERs < \$150,000/QALY were considered cost-effective. The numerator represents the total increment in healthcare costs (in 2018 US\$) for the adult population (aged 15-64) in a given city, and the denominator represents the total gain in quality-adjusted life years for this group.



**MIAMI****Supplement Table 1. Panel C. Incremental costs, QALYs and incremental cost-effectiveness ratios (ICER) of individual interventions**

| Intervention                   | Miami                   |                     |                    |
|--------------------------------|-------------------------|---------------------|--------------------|
|                                | $\Delta TC$ (\$M)       | $\Delta QALYs$      | ICER (\$'000s)     |
| <i>HIV prevention programs</i> |                         |                     |                    |
| Syringe service program        | -214.9 [-701.8 - 100.8] | 3507 [-199 - 11821] | CS [CS - 203.4]    |
| MOUD with buprenorphine        | 148.7 [-113.9 - 512.8]  | 8378 [4904 - 14020] | 17.7 [CS - 81.1]   |
| MOUD with methadone            | 1.7 [-184.5 - 186.3]    | 102 [-1461 - 1746]  | 16.6 [CS - 248.3]  |
| PrEP for PWID and MSMWID       | 415.5 [-476.3 - 961.9]  | 7007 [1385 - 21243] | 59.3 [CS - 651.6]  |
| <i>HIV Testing</i>             |                         |                     |                    |
| EMR testing offer reminder     | -23.0 [-239.7 - 163.8]  | 1244 [-657 - 4164]  | CS [CS - 491.3]    |
| Nurse-initiated rapid testing  | -17.2 [-235.6 - 166.9]  | 1059 [-758 - 4361]  | CS [CS - 485.8]    |
| MOUD integrated rapid testing  | -3.5 [-192.9 - 180.6]   | 141 [-1420 - 1771]  | CS [CS - 134.6]    |
| <i>ART engagement</i>          |                         |                     |                    |
| Case management (ARTAS)        | 21.5 [-162.7 - 205.1]   | 192 [-1388 - 1851]  | 112.0 [CS - 796.4] |
| Care coordination              | 23.3 [-160.5 - 205.9]   | 59 [-1506 - 1692]   | 393.9 [CS - 520.6] |
| Targeted care coordination     | 4.7 [-182.2 - 186.4]    | 55 [-1493 - 1692]   | 85.7 [CS - 119.6]  |
| EMR ART engagement reminder    | 41.2 [-145.9 - 215.9]   | 657 [-1087 - 2379]  | 62.7 [CS - 1046.5] |
| RAPID ART initiation           | 7.2 [-179.3 - 189.3]    | 49 [-1507 - 1684]   | 148.7 [CS - 164.2] |
| <i>ART re-engagement</i>       |                         |                     |                    |
| Enhanced personal contact      | 20.2 [-170.6 - 201.0]   | 326 [-1253 - 1966]  | 62.1 [CS - 880.9]  |
| Re-linkage program             | 12.7 [-173.6 - 193.9]   | 209 [-1380 - 1890]  | 60.8 [CS - 638.5]  |

\* Values represent the results obtained from the deterministic analysis and the 95% credible interval in brackets from the probabilistic sensitivity analysis over 2,000 simulations.

QALY: Quality-adjusted life years; TC: Total costs; CS: Cost-saving; PWID: People who inject drugs; MSM: Men who have sex with men; PrEP: Pre-exposure prophylaxis; MOUD: Medication for opioid use disorder; ART: Antiretroviral therapy; EMR: Electronic medical records; RAPID: Rapid ART Program for Individuals with an HIV Diagnosis.

## NEW YORK CITY

**Supplement Table 1. Panel A. Results of incremental cost-effectiveness analysis for combination implementation strategies comprising New York City's health production function**

| <b>New York City</b> |                              |                          |                        |
|----------------------|------------------------------|--------------------------|------------------------|
| <i>Strategy</i>      | <i>Incremental Cost: \$M</i> | <i>Incremental QALYs</i> | <i>ICER: \$ / QALY</i> |
| 1                    | 0.0                          | 0                        | 0                      |
| 2                    | 0.1                          | 90                       | 1,008                  |
| 3                    | 61.2                         | 1,884                    | 34,100                 |
| 4                    | 765.4                        | 21,772                   | 35,407                 |
| 5                    | 788.7                        | 22,104                   | 70,161                 |
| 6                    | 896.0                        | 23,357                   | 85,581                 |
| 7                    | 907.6                        | 23,487                   | 89,716                 |
| 8                    | 1066.9                       | 25,201                   | 92,922                 |
| 9                    | 1077.2                       | 25,310                   | 95,126                 |
| 10                   | 1089.9                       | 25,412                   | 123,105                |
| <b>11</b>            | <b>1115.8</b>                | <b>25,615</b>            | <b>128,387</b>         |
| 12                   | 1120.0                       | 25,634                   | 220,893                |
| 13                   | 1263.9                       | 25,997                   | 395,568                |
| 14                   | 4975.3                       | 26,666                   | 5,553,489              |

\$B: billions of \$US; \$M: millions of \$US (both in 2018 \$US); QALYs: quality-adjusted life years; ICER: incremental cost-effectiveness ratio; CS: cost-saving. Each of the strategies 1 through 8 represent the highest-valued strategies for a given investment level. Incremental costs and QALYs are compared against the next-most-costly strategy on the production function (i.e. Strategy 2 versus 1, 3 versus 2 etc.).

**NEW YORK CITY**

**Supplement Table 1. Panel B. Combination implementation strategies, delivered at optimistic implementation scale-up, residing on New York City’s health production function**

|                                |                               | Health-maximizing combination |        |        |        |          |          |          |          |          |          |          |                    |                    |                    |
|--------------------------------|-------------------------------|-------------------------------|--------|--------|--------|----------|----------|----------|----------|----------|----------|----------|--------------------|--------------------|--------------------|
| Strategy                       |                               | 1                             | 2      | 3      | 4      | 5        | 6        | 7        | 8        | 9        | 10       | 11       | 12                 | 13                 | 14                 |
| <b>HIV Prevention Programs</b> | Syringe service program       | Expand                        | Expand | Expand | Expand | Maintain | Not Cost-Effective | Not Cost-Effective | Not Cost-Effective |
|                                | MOUD with buprenorphine       | Expand                        | Expand | Expand | Expand | Maintain | Not Cost-Effective | Not Cost-Effective | Not Cost-Effective |
|                                | MOUD with methadone           | Expand                        | Expand | Expand | Expand | Maintain | Not Cost-Effective | Not Cost-Effective | Not Cost-Effective |
|                                | PrEP for PWID and MSMWID      | Expand                        | Expand | Expand | Expand | Maintain | Not Cost-Effective | Not Cost-Effective | Not Cost-Effective |
| <b>HIV Testing</b>             | EMR testing offer reminder    | Expand                        | Expand | Expand | Expand | Maintain | Not Cost-Effective | Not Cost-Effective | Not Cost-Effective |
|                                | Nurse-initiated rapid testing | Expand                        | Expand | Expand | Expand | Maintain | Not Cost-Effective | Not Cost-Effective | Not Cost-Effective |
|                                | MOUD integrated rapid testing | Expand                        | Expand | Expand | Expand | Maintain | Not Cost-Effective | Not Cost-Effective | Not Cost-Effective |
| <b>ART Engagement</b>          | Case management (ARTAS)       | Expand                        | Expand | Expand | Expand | Maintain | Not Cost-Effective | Not Cost-Effective | Not Cost-Effective |
|                                | Care coordination             | Expand                        | Expand | Expand | Expand | Maintain | Not Cost-Effective | Not Cost-Effective | Not Cost-Effective |
|                                | Targeted care coordination    | Expand                        | Expand | Expand | Expand | Maintain | Not Cost-Effective | Not Cost-Effective | Not Cost-Effective |
|                                | EMR ART engagement reminder   | Expand                        | Expand | Expand | Expand | Maintain | Not Cost-Effective | Not Cost-Effective | Not Cost-Effective |
|                                | RAPID ART initiation          | Expand                        | Expand | Expand | Expand | Maintain | Not Cost-Effective | Not Cost-Effective | Not Cost-Effective |
| <b>ART Re-Engagement</b>       | Enhanced person contact       | Expand                        | Expand | Expand | Expand | Maintain | Not Cost-Effective | Not Cost-Effective | Not Cost-Effective |
|                                | Re-linkage program            | Expand                        | Expand | Expand | Expand | Maintain | Not Cost-Effective | Not Cost-Effective | Not Cost-Effective |

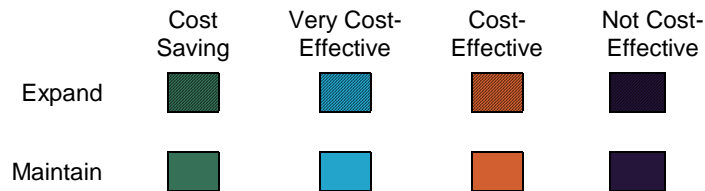

QALY – Quality adjusted life year; ICER – Incremental cost-effectiveness ratio; MOUD – Medication for opioid use disorder; PrEP – Pre-exposure prophylaxis; MSM – men who have sex with men; EMR – Electronic medical record; ARTAS – Anti-Retroviral Treatment and Access to Services; ART – Antiretroviral therapy; RAPID – Rapid ART Program for Individuals with an HIV Diagnosis.

† The health-maximizing strategy that remained cost-effective was determined by calculating the incremental cost-effectiveness ratio, defined as the additional cost of a specific combination implementation strategy divided by its additional health benefit, as compared with the next-most-costly strategy on the health production function. Combination implementation strategies with ICERs less than \$50,000/QALY were considered very cost-effective, while those with ICERs < \$150,000/QALY were considered cost-effective. The numerator represents the total increment in healthcare costs (in 2018 US\$) for the adult population (aged 15-64) in a given city, and the denominator represents the total gain in quality-adjusted life years for this group.

## NEW YORK CITY

**Supplement Table 1. Panel C. Incremental costs, QALYs and incremental cost-effectiveness ratios (ICER) of individual interventions**

| Intervention                   | New York City            |                       |                         |
|--------------------------------|--------------------------|-----------------------|-------------------------|
|                                | $\Delta TC$ (\$M)        | $\Delta QALYs$        | ICER (\$'000s)          |
| <i>HIV prevention programs</i> |                          |                       |                         |
| Syringe service program        | 142.9 [38.0 - 230.8]     | 497 [-441 - 2149]     | 287.4 [CS - 3262.1]     |
| MOUD with buprenorphine        | 703.0 [391.2 - 1754.8]   | 19667 [12557 - 28621] | 35.7 [22.1 - 86.8]      |
| MOUD with methadone            | 61.3 [-1.3 - 205.0]      | 1781 [994 - 3463]     | 34.4 [CS - 153.9]       |
| PrEP for PWID and MSMWID       | 3707.1 [3072.1 - 4449.9] | 1045 [65 - 3155]      | 3548.4 [738.8 - 9019.2] |
| <i>HIV Testing</i>             |                          |                       |                         |
| EMR testing offer reminder     | 21.8 [-56.6 - 99.5]      | 415 [-395 - 1459]     | 52.5 [CS - 1062.1]      |
| Nurse-initiated rapid testing  | 22.1 [-56.4 - 96.8]      | 344 [-441 - 1440]     | 64.4 [CS - 1092.9]      |
| MOUD integrated rapid testing  | 0.1 [-71.4 - 78.5]       | 90 [-756 - 880]       | 1.0 [CS - 407.1]        |
| <i>ART engagement</i>          |                          |                       |                         |
| Case management (ARTAS)        | 12.0 [-53.9 - 96.8]      | 93 [-748 - 872]       | 129.1 [CS - 892.1]      |
| Care coordination              | 52.0 [-14.5 - 150.7]     | 115 [-734 - 865]      | 452.8 [CS - 2228.2]     |
| Targeted care coordination     | 12.4 [-58.1 - 91.8]      | 146 [-677 - 908]      | 85.1 [CS - 885.9]       |
| EMR ART engagement reminder    | 192.6 [46.2 - 317.0]     | 2154 [443 - 3637]     | 89.4 [27.4 - 290.2]     |
| RAPID ART initiation           | 4.4 [-65.9 - 82.5]       | 22 [-821 - 783]       | 197.8 [CS - 465.2]      |
| <i>ART re-engagement</i>       |                          |                       |                         |
| Enhanced personal contact      | 71.7 [-11.9 - 167.7]     | 845 [-95 - 1782]      | 84.9 [CS - 773.6]       |
| Re-linkage program             | 45.1 [-28.9 - 132.2]     | 541 [-380 - 1506]     | 83.5 [CS - 1192.6]      |

\* Values represent the results obtained from the deterministic analysis and the 95% credible interval in brackets from the probabilistic sensitivity analysis over 2,000 simulations.

QALY: Quality-adjusted life years; TC: Total costs; CS: Cost-saving; PWID: People who inject drugs; MSM: Men who have sex with men; PrEP: Pre-exposure prophylaxis; MOUD: Medication for opioid use disorder; ART: Antiretroviral therapy; EMR: Electronic medical records; RAPID: Rapid ART Program for Individuals with an HIV Diagnosis.

## SEATTLE

### Supplement Table 1. Panel A. Results of incremental cost-effectiveness analysis for combination implementation strategies comprising Seattle's health production function

| <b>Seattle</b>  |                              |                          |                        |
|-----------------|------------------------------|--------------------------|------------------------|
| <i>Strategy</i> | <i>Incremental Cost: \$M</i> | <i>Incremental QALYs</i> | <i>ICER: \$ / QALY</i> |
| 1               | 0.0                          | 0                        | 0                      |
| 2               | 12.9                         | 455                      | 28,386                 |
| 3               | 175.0                        | 5,852                    | 30,029                 |
| 4               | 175.8                        | 5,874                    | 34,270                 |
| 5               | 177.1                        | 5,890                    | 87,293                 |
| <b>6</b>        | <b>180.1</b>                 | <b>5,914</b>             | <b>127,920</b>         |
| 7               | 181.6                        | 5,923                    | 156,381                |
| 8               | 187.2                        | 5,953                    | 185,421                |
| 9               | 192.7                        | 5,971                    | 300,871                |
| 10              | 193.4                        | 5,973                    | 353,847                |
| 11              | 225.4                        | 6,035                    | 519,615                |
| 12              | 225.8                        | 6,035                    | 821,837                |
| 13              | 1232.4                       | 6,123                    | 11,433,491             |

\$B: billions of \$US; \$M: millions of \$US (both in 2018 \$US); QALYs: quality-adjusted life years; ICER: incremental cost-effectiveness ratio; CS: cost-saving. Each of the strategies 1 through 8 represent the highest-valued strategies for a given investment level. Incremental costs and QALYs are compared against the next-most-costly strategy on the production function (i.e. Strategy 2 versus 1, 3 versus 2 etc.).

**SEATTLE**

**Supplement Table 1. Panel B. Combination implementation strategies, delivered at optimistic implementation scale-up, residing on Seattle’s health production function**

|                                |                               | Health-maximizing combination |        |        |        |        |          |                    |                    |                    |                    |                    |                    |                    |
|--------------------------------|-------------------------------|-------------------------------|--------|--------|--------|--------|----------|--------------------|--------------------|--------------------|--------------------|--------------------|--------------------|--------------------|
| Strategy                       |                               | 1                             | 2      | 3      | 4      | 5      | 6        | 7                  | 8                  | 9                  | 10                 | 11                 | 12                 | 13                 |
| <b>HIV Prevention Programs</b> | Syringe service program       | Expand                        | Expand | Expand | Expand | Expand | Maintain | Not Cost-Effective |
|                                | MOUD with buprenorphine       | Expand                        | Expand | Expand | Expand | Expand | Maintain | Not Cost-Effective |
|                                | MOUD with methadone           | Expand                        | Expand | Expand | Expand | Expand | Maintain | Not Cost-Effective |
|                                | PrEP for PWID and MSMWID      | Expand                        | Expand | Expand | Expand | Expand | Maintain | Not Cost-Effective |
| <b>HIV Testing</b>             | EMR testing offer reminder    | Expand                        | Expand | Expand | Expand | Expand | Maintain | Not Cost-Effective |
|                                | Nurse-initiated rapid testing | Expand                        | Expand | Expand | Expand | Expand | Maintain | Not Cost-Effective |
|                                | MOUD integrated rapid testing | Expand                        | Expand | Expand | Expand | Expand | Maintain | Not Cost-Effective |
| <b>ART Engagement</b>          | Case management (ARTAS)       | Expand                        | Expand | Expand | Expand | Expand | Maintain | Not Cost-Effective |
|                                | Care coordination             | Expand                        | Expand | Expand | Expand | Expand | Maintain | Not Cost-Effective |
|                                | Targeted care coordination    | Expand                        | Expand | Expand | Expand | Expand | Maintain | Not Cost-Effective |
|                                | EMR ART engagement reminder   | Expand                        | Expand | Expand | Expand | Expand | Maintain | Not Cost-Effective |
|                                | RAPID ART initiation          | Expand                        | Expand | Expand | Expand | Expand | Maintain | Not Cost-Effective |
| <b>ART Re-Engagement</b>       | Enhanced person contact       | Expand                        | Expand | Expand | Expand | Expand | Maintain | Not Cost-Effective |
|                                | Re-linkage program            | Expand                        | Expand | Expand | Expand | Expand | Maintain | Not Cost-Effective |

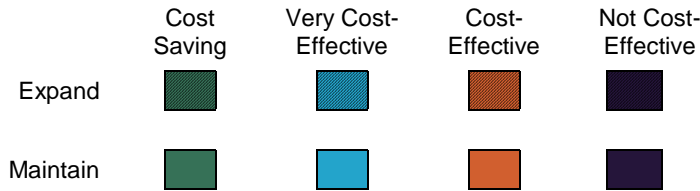

QALY – Quality adjusted life year; ICER – Incremental cost-effectiveness ratio; MOUD – Medication for opioid use disorder; PrEP – Pre-exposure prophylaxis; MSM – men who have sex with men; EMR – Electronic medical record; ARTAS – Anti-Retroviral Treatment and Access to Services; ART – Antiretroviral therapy; RAPID – Rapid ART Program for Individuals with an HIV Diagnosis.

† The health-maximizing strategy that remained cost-effective was determined by calculating the incremental cost-effectiveness ratio, defined as the additional cost of a specific combination implementation strategy divided by its additional health benefit, as compared with the next-most-costly strategy on the health production function. Combination implementation strategies with ICERs less than \$50,000/QALY were considered very cost-effective, while those with ICERs < \$150,000/QALY were considered cost-effective. The numerator represents the total increment in healthcare costs (in 2018 US\$) for the adult population (aged 15-64) in a given city, and the denominator represents the total gain in quality-adjusted life years for this group.

**SEATTLE****Supplement Table 1. Panel C. Incremental costs, QALYs and incremental cost-effectiveness ratios (ICER) of individual interventions**

| Intervention                   | Seattle                |                    |                          |
|--------------------------------|------------------------|--------------------|--------------------------|
|                                | $\Delta TC$ (\$M)      | $\Delta QALYs$     | ICER (\$'000s)           |
| <i>HIV prevention programs</i> |                        |                    |                          |
| Syringe service program        | 29.8 [19.1 - 58.2]     | 83 [-5 - 109]      | 359.6 [CS - 7469.5]      |
| MOUD with buprenorphine        | 161.5 [102.4 - 423.4]  | 5375 [3368 - 7649] | 30.1 [19.7 - 81.7]       |
| MOUD with methadone            | 12.9 [4.6 - 32.7]      | 455 [311 - 585]    | 28.4 [10.2 - 80.6]       |
| PrEP for PWID and MSMWID       | 998.8 [836.1 - 1207.8] | 140 [65 - 160]     | 7159.7 [5598.2 - 9907.4] |
| <i>HIV Testing</i>             |                        |                    |                          |
| EMR testing offer reminder     | 5.5 [-3.3 - 13.4]      | 39 [15 - 57]       | 141.0 [CS - 601.5]       |
| Nurse-initiated rapid testing  | 5.4 [-3.4 - 13.5]      | 35 [10 - 64]       | 156.5 [CS - 815.7]       |
| MOUD integrated rapid testing  | 0.3 [-7.1 - 8.4]       | 9 [-7 - 24]        | 37.3 [CS - 2264.4]       |
| <i>ART engagement</i>          |                        |                    |                          |
| Case management (ARTAS)        | 1.4 [-5.8 - 9.6]       | 9 [-7 - 24]        | 157.5 [CS - 2944.2]      |
| Care coordination              | 6.7 [-0.3 - 17.8]      | 3 [-11 - 17]       | 2617.5 [CS - 7919.4]     |
| Targeted care coordination     | 0.4 [-6.7 - 8.7]       | 1 [-13 - 15]       | 510.5 [CS - 5520.6]      |
| EMR ART engagement reminder    | 3.4 [-4.8 - 11.1]      | 28 [4 - 49]        | 120.8 [CS - 760.7]       |
| RAPID ART initiation           | 0.7 [-6.6 - 8.8]       | 2 [-12 - 16]       | 317.3 [CS - 4225.1]      |
| <i>ART re-engagement</i>       |                        |                    |                          |
| Enhanced personal contact      | 1.0 [-6.3 - 9.0]       | 11 [-5 - 27]       | 89.6 [CS - 1529.7]       |
| Re-linkage program             | 0.7 [-6.6 - 8.7]       | 7 [-8 - 22]        | 104.6 [CS - 2305.9]      |

\* Values represent the results obtained from the deterministic analysis and the 95% credible interval in brackets from the probabilistic sensitivity analysis over 2,000 simulations.

QALY: Quality-adjusted life years; TC: Total costs; CS: Cost-saving; PWID: People who inject drugs; MSM: Men who have sex with men; PrEP: Pre-exposure prophylaxis; MOUD: Medication for opioid use disorder; ART: Antiretroviral therapy; EMR: Electronic medical records; RAPID: Rapid ART Program for Individuals with an HIV Diagnosis.

**Supplemental Figure 1. Probabilistic sensitivity analysis displaying uncertainty surrounding optimal combination implementation strategies (with 50% and 95% uncertainty ellipses)**

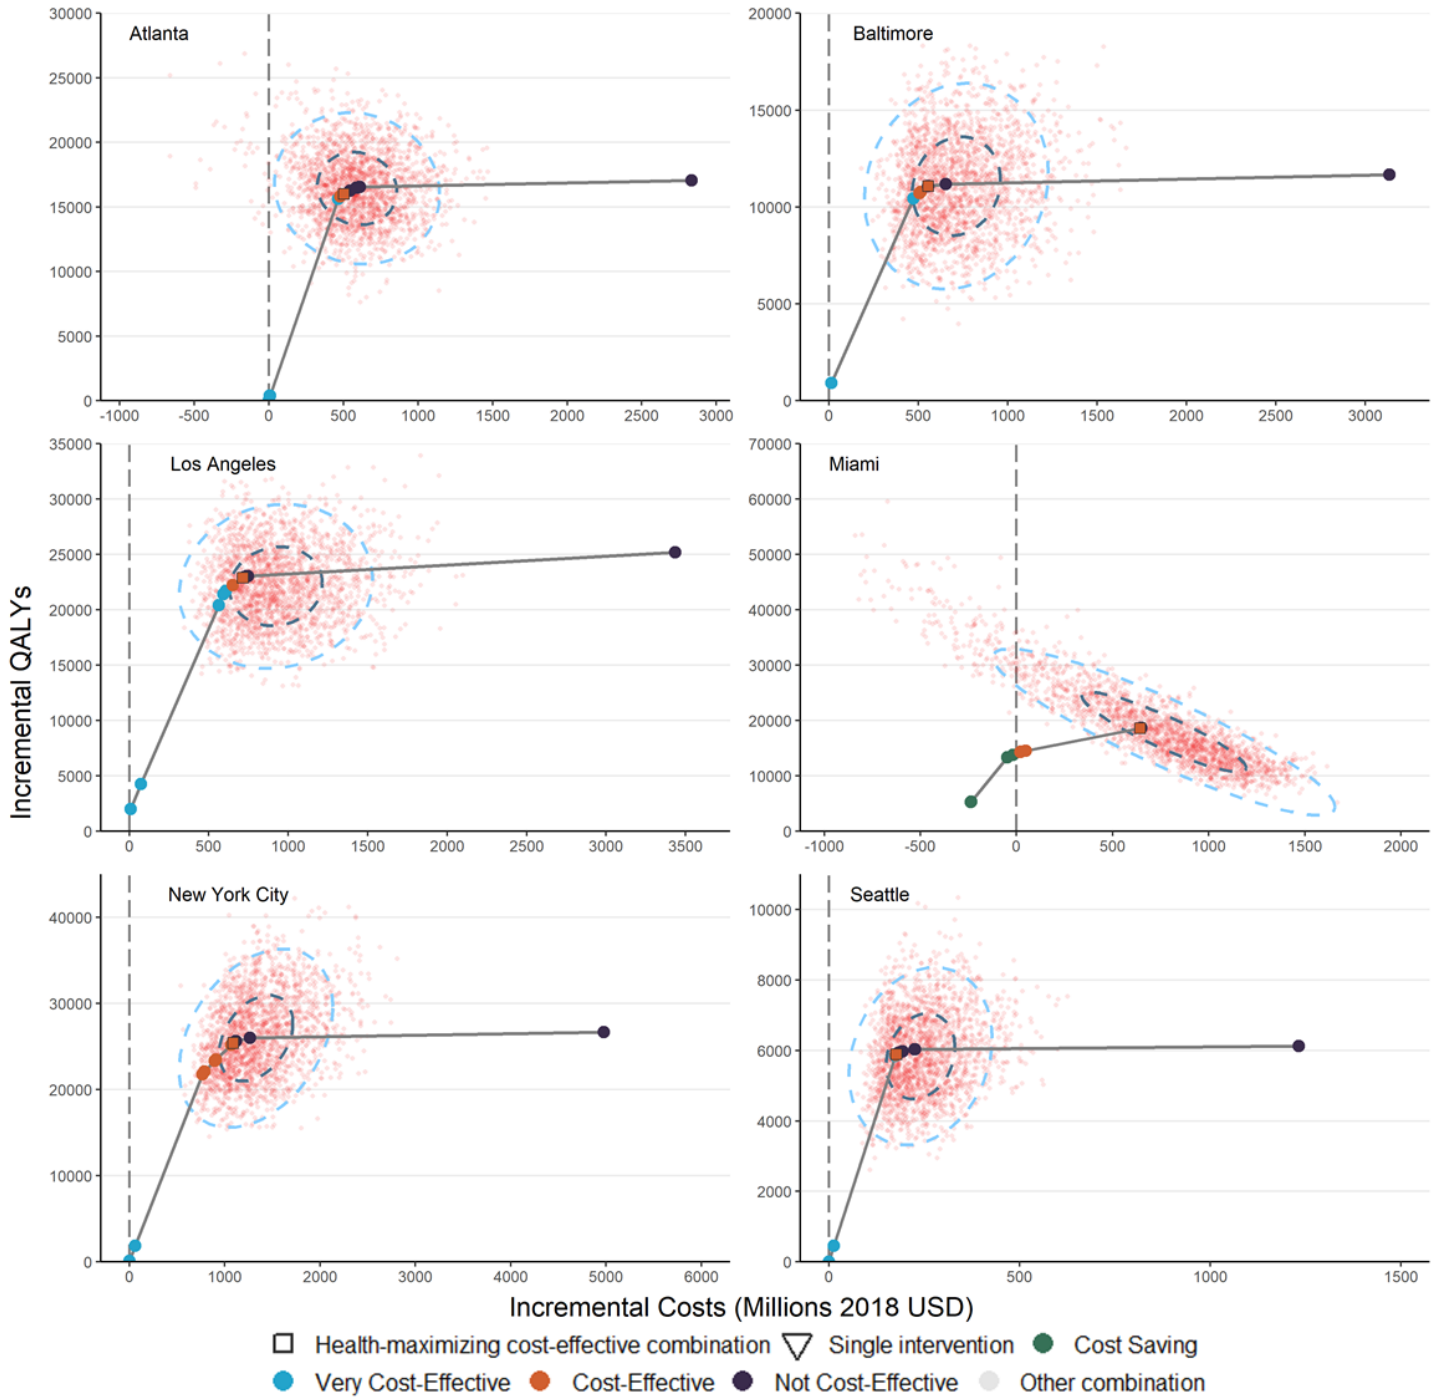



**Supplement Figure 2. City-level health production functions for the changing opioid epidemic scenario**

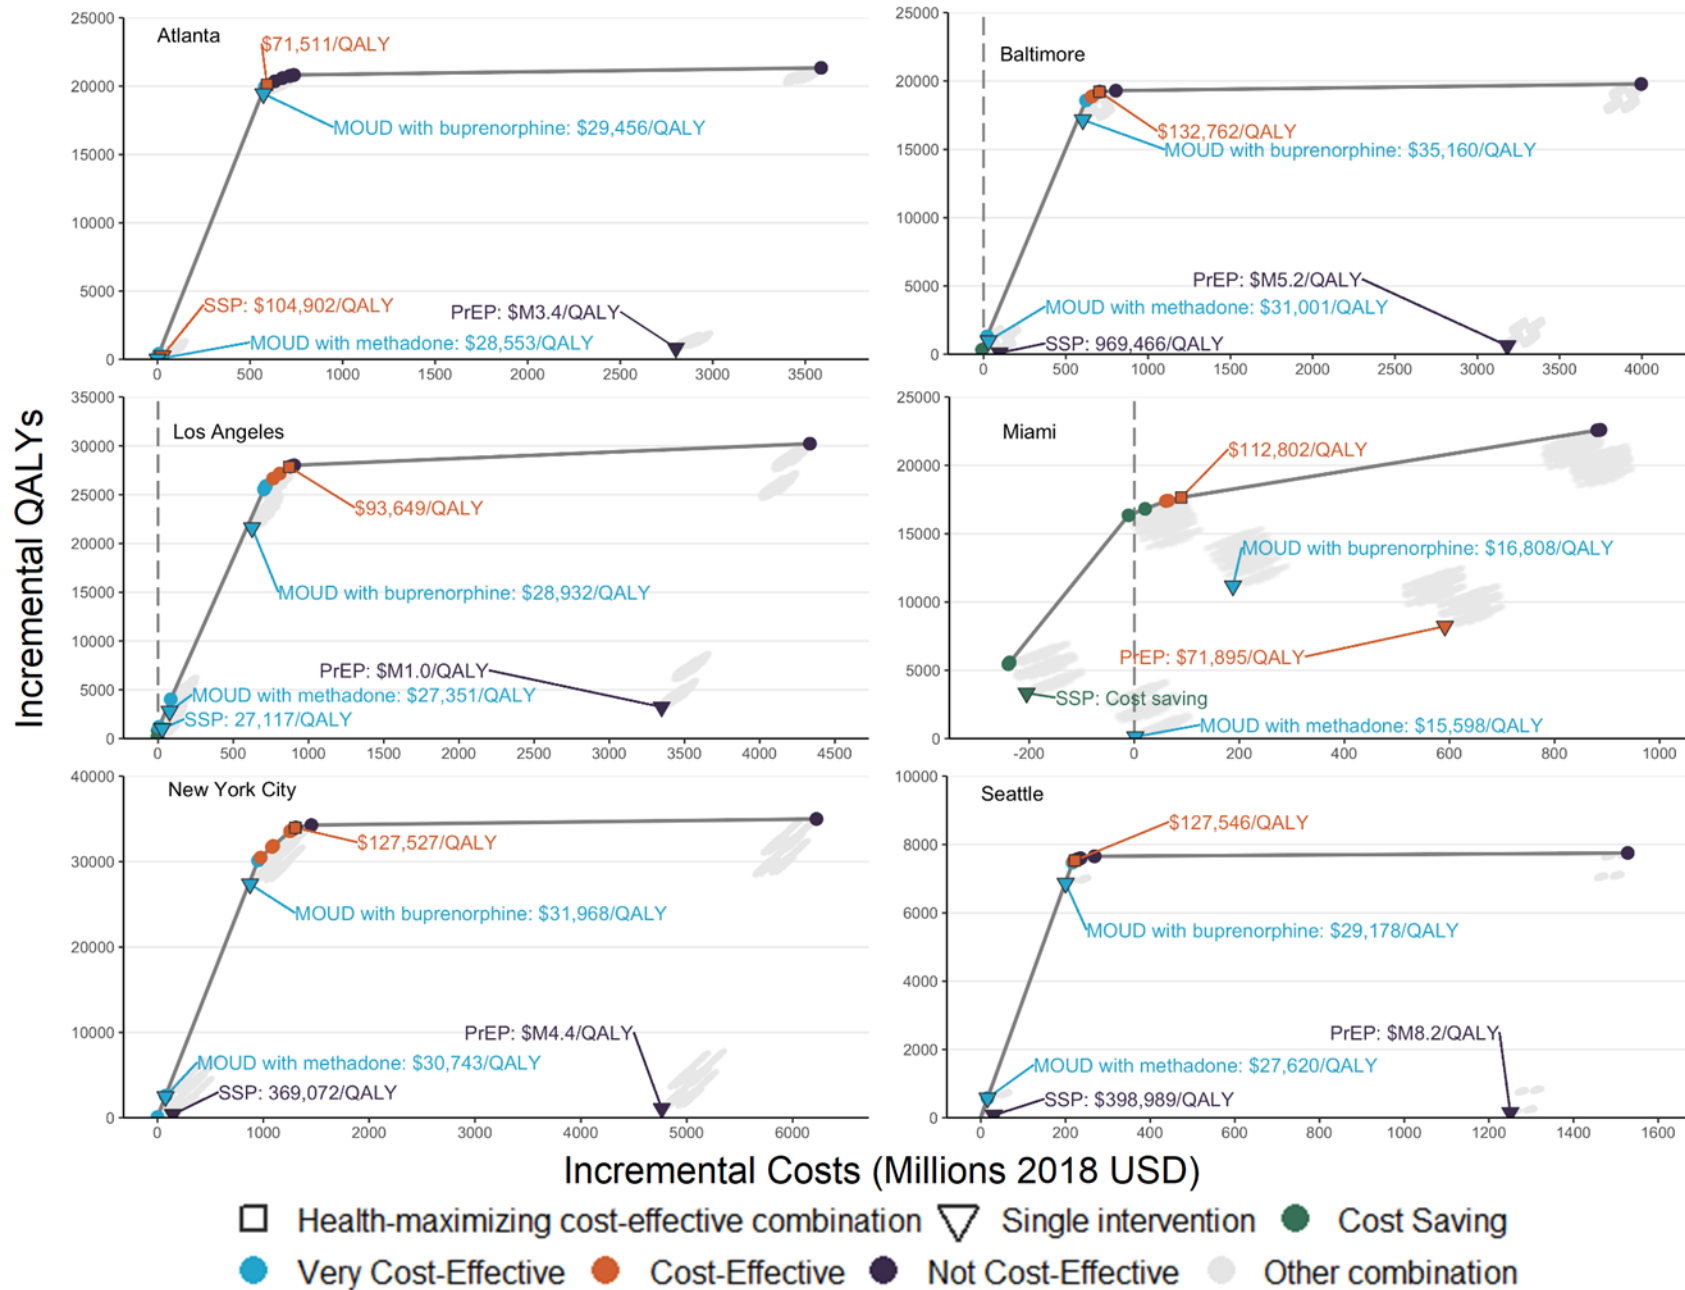

**Supplement Figure 3. Interventions included in the health-maximizing cost-effective combinations for the changing opioid epidemic scenario**

|                                       | <i>Atlanta</i> | <i>Baltimore</i> | <i>LA</i> | <i>Miami</i> | <i>NYC</i> | <i>Seattle</i> |
|---------------------------------------|----------------|------------------|-----------|--------------|------------|----------------|
| <b><i>HIV prevention programs</i></b> |                |                  |           |              |            |                |
| Syringe service program               |                |                  |           |              |            |                |
| MOUD with buprenorphine               |                |                  |           |              |            |                |
| MOUD with methadone                   |                |                  |           |              |            |                |
| PrEP for PWID and MSMWID              |                |                  |           |              |            |                |
| <b><i>HIV testing</i></b>             |                |                  |           |              |            |                |
| EMR testing offer reminder            |                |                  |           |              |            |                |
| Nurse-initiated rapid testing         |                |                  |           |              |            |                |
| MOUD integrated rapid testing         |                |                  |           |              |            |                |
| <b><i>ART engagement</i></b>          |                |                  |           |              |            |                |
| Case management (ARTAS)               |                |                  |           |              |            |                |
| Care coordination                     |                |                  |           |              |            |                |
| Targeted care coordination            |                |                  |           |              |            |                |
| EMR ART engagement reminder           |                |                  |           |              |            |                |
| RAPID ART initiation                  |                |                  |           |              |            |                |
| <b><i>ART re-engagement</i></b>       |                |                  |           |              |            |                |
| Enhanced person contact               |                |                  |           |              |            |                |
| Re-linkage program                    |                |                  |           |              |            |                |


Expand
Maintain

Supplement Figure 4. City-level health production functions for the Free PrEP scenario

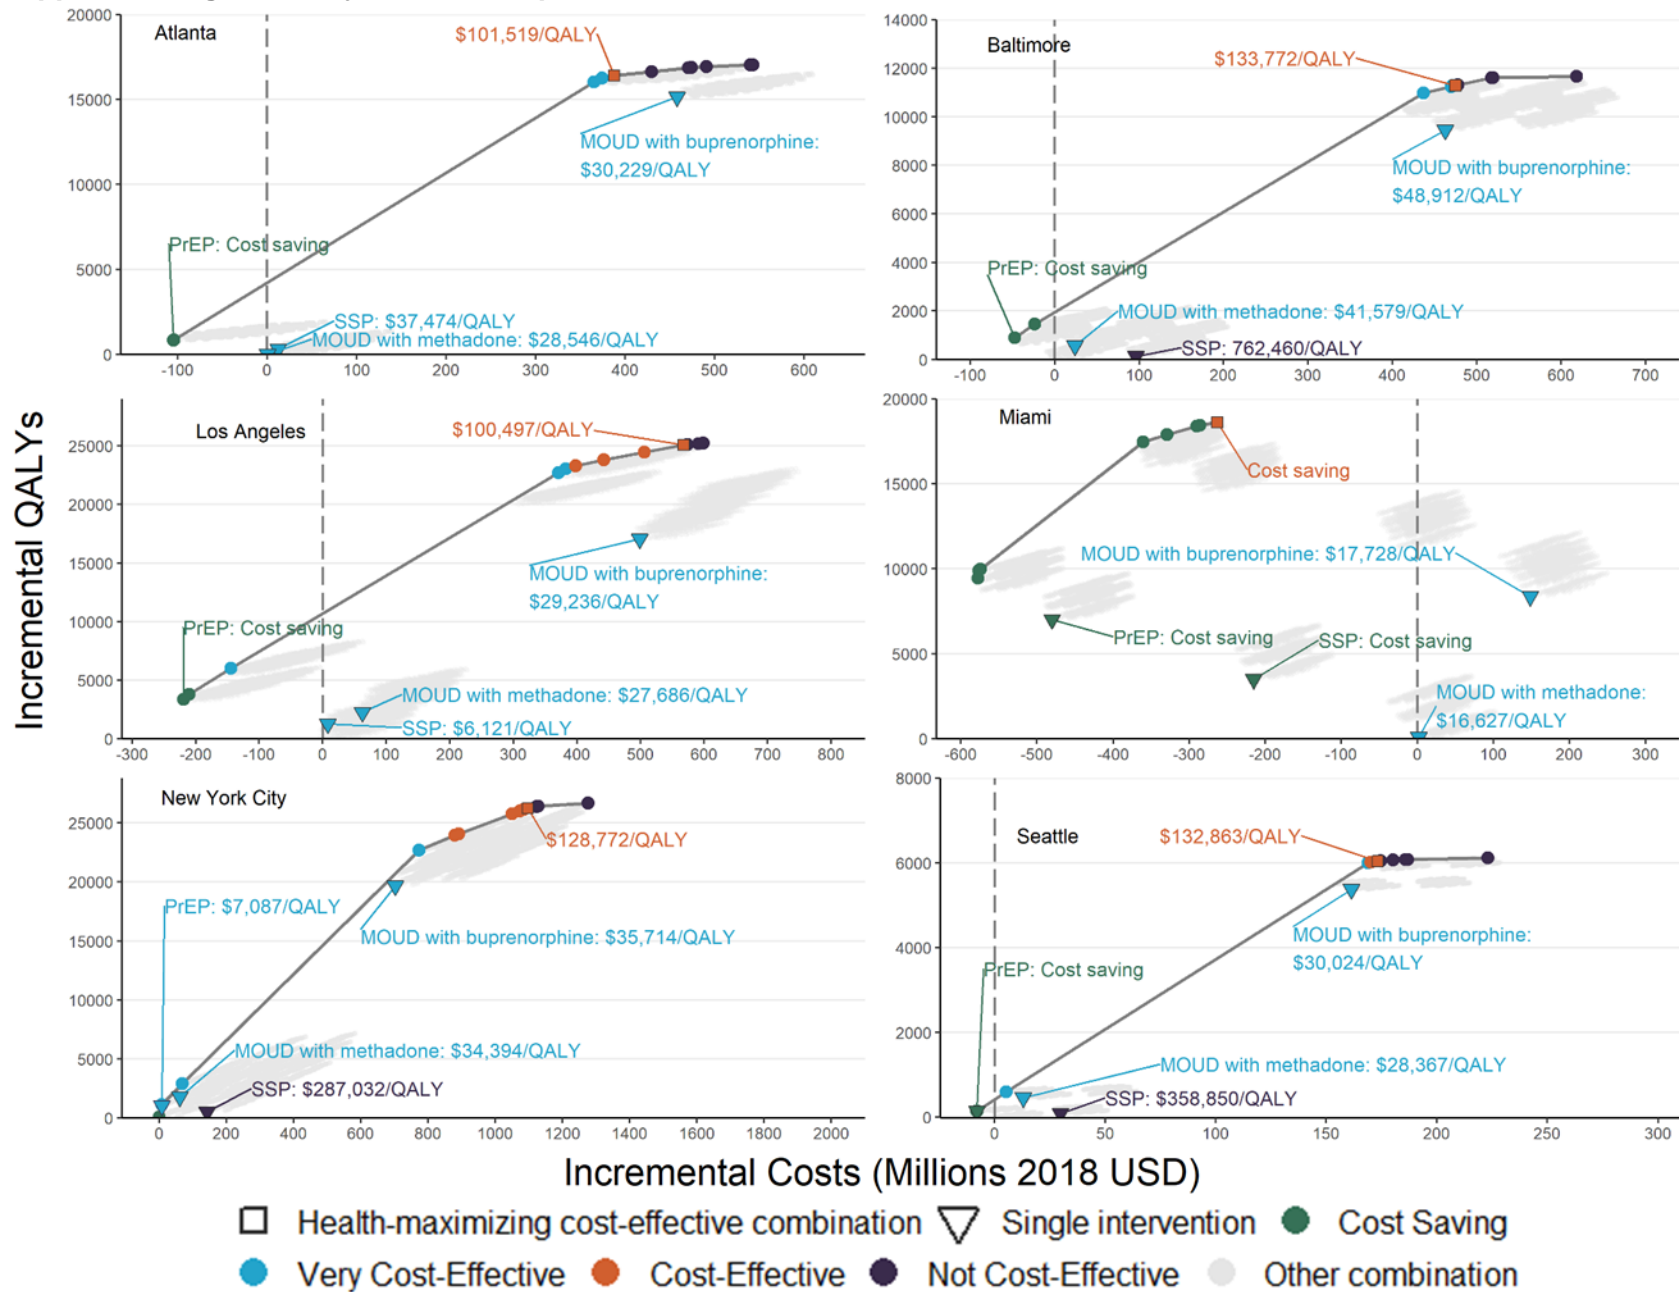

**Supplement Figure 5. Interventions included in the health-maximizing cost-effective combinations for the free PrEP scenario**

|                                       | <i>Atlanta</i> | <i>Baltimore</i> | <i>LA</i> | <i>Miami</i> | <i>NYC</i> | <i>Seattle</i> |
|---------------------------------------|----------------|------------------|-----------|--------------|------------|----------------|
| <b><i>HIV prevention programs</i></b> |                |                  |           |              |            |                |
| Syringe service program               |                |                  |           |              |            |                |
| MOUD with buprenorphine               |                |                  |           |              |            |                |
| MOUD with methadone                   |                |                  |           |              |            |                |
| PrEP for PWID and MSMWID              |                |                  |           |              |            |                |
| <b><i>HIV testing</i></b>             |                |                  |           |              |            |                |
| EMR testing offer reminder            |                |                  |           |              |            |                |
| Nurse-initiated rapid testing         |                |                  |           |              |            |                |
| MOUD integrated rapid testing         |                |                  |           |              |            |                |
| <b><i>ART engagement</i></b>          |                |                  |           |              |            |                |
| Case management (ARTAS)               |                |                  |           |              |            |                |
| Care coordination                     |                |                  |           |              |            |                |
| Targeted care coordination            |                |                  |           |              |            |                |
| EMR ART engagement reminder           |                |                  |           |              |            |                |
| RAPID ART initiation                  |                |                  |           |              |            |                |
| <b><i>ART re-engagement</i></b>       |                |                  |           |              |            |                |
| Enhanced person contact               |                |                  |           |              |            |                |
| Re-linkage program                    |                |                  |           |              |            |                |


Expand
Maintain

**Supplement Figure 6. Interventions excluded from combinations**

|                                |                                              | <i>HIV Prevention Programs</i> |    |    |    | <i>HIV Testing</i> |    |    | <i>ART Engagement</i> |    |    |    |    | <i>ART Re-Engagement</i> |    |
|--------------------------------|----------------------------------------------|--------------------------------|----|----|----|--------------------|----|----|-----------------------|----|----|----|----|--------------------------|----|
|                                |                                              | P1                             | P2 | P3 | P4 | D3                 | D4 | D5 | T1                    | T2 | T3 | T4 | T5 | T6                       | T7 |
| <b>HIV Prevention Programs</b> | Syringe service program                      |                                |    |    |    |                    |    |    |                       |    |    |    |    |                          |    |
|                                | MOUD with buprenorphine                      |                                |    |    |    |                    |    |    |                       |    |    |    |    |                          |    |
|                                | MOUD with methadone                          |                                |    |    |    |                    |    |    |                       |    |    |    |    |                          |    |
|                                | PrEP for PWID and MSMWID                     |                                |    |    |    |                    |    |    |                       |    |    |    |    |                          |    |
| <b>HIV Testing</b>             | EMR testing offer reminder (EMR)             |                                |    |    |    |                    |    |    |                       |    |    |    |    |                          |    |
|                                | Nurse-initiated rapid testing (Nurse)        |                                |    |    |    |                    |    |    |                       |    |    |    |    |                          |    |
|                                | MOUD integrated rapid testing (MOUD testing) |                                |    |    |    |                    |    |    |                       |    |    |    |    |                          |    |
| <b>ART Engagement</b>          | Case management (ARTAS)                      |                                |    |    |    |                    |    |    |                       |    |    |    |    |                          |    |
|                                | Care coordination                            |                                |    |    |    |                    |    |    |                       |    |    |    |    |                          |    |
|                                | Targeted care coordination                   |                                |    |    |    |                    |    |    |                       |    |    |    |    |                          |    |
|                                | EMR ART engagement reminder                  |                                |    |    |    |                    |    |    |                       |    |    |    |    |                          |    |
|                                | RAPID ART initiation                         |                                |    |    |    |                    |    |    |                       |    |    |    |    |                          |    |
| <b>ART Re-Engagement</b>       | Enhanced person contact                      |                                |    |    |    |                    |    |    |                       |    |    |    |    |                          |    |
|                                | Re-linkage program                           |                                |    |    |    |                    |    |    |                       |    |    |    |    |                          |    |

Shaded areas indicate excluded combinations that would not practically be implemented jointly, such as care coordination delivered to the full population of PLHIV and the same care coordination intervention targeted to individuals with CD4 <200 cells/ $\mu$ L.

**Supplemental Table 2. Costs attributable to the implementation and delivery of HIV prevention programs (2018 USD)**

| Intervention                                     | Implementation Cost*      |                                 | Delivery Cost               |                                         |
|--------------------------------------------------|---------------------------|---------------------------------|-----------------------------|-----------------------------------------|
|                                                  | \$ (95% CI)               | Description                     | \$ (95% CI)                 | Description                             |
| <b>Syringe service program (SSP)</b>             |                           |                                 |                             |                                         |
| <i>One-time costs for scale-up</i>               | 16,111<br>(11,194-21,133) | Start-up costs                  | 1.24<br>(0.92-1.56)         | Cost per syringe, including overhead    |
| <b>Medication for opioid use disorder (MOUD)</b> |                           |                                 |                             |                                         |
| <i>Buprenorphine</i>                             | 1,276.92†                 | Costs per prescribing physician | 414.81<br>(274.67-1,141.81) | Monthly costs per person"               |
| <i>Methadone</i>                                 | 4,481.54†                 | Costs per OTP                   | 184.28<br>(146.61-229.19)   | Monthly costs per person"               |
| <b>Pre-exposure prophylaxis (PrEP)</b>           |                           |                                 |                             |                                         |
|                                                  | 177.00†                   | Costs per prescribing physician | 883.83<br>(631.94-1,177.27) | Monthly costs per person                |
|                                                  |                           |                                 | 34.37<br>(11.46-68.75)      | Costs for consultation per individual** |

MSM: Men who have sex with men; MWID: MSM who inject drugs; CI: Confidence interval.

\* Costs in the model are applied monthly per individual, all assumptions and calculations have been presented elsewhere

" Costs include costs attributable to toxicology and overhead.

\*\* Costs include costs attributable to HIV screening.

† 95% CI for monthly costs applied in the model were derived based on the ranges of setting-specific patient volumes.

**Supplemental Table 2. CHEERS checklist**

| Section/Item                                           | Item | Recommendation                                                                                                      | Reported on page no.                                                   |
|--------------------------------------------------------|------|---------------------------------------------------------------------------------------------------------------------|------------------------------------------------------------------------|
| <b>Title and Abstract</b>                              |      |                                                                                                                     |                                                                        |
| Title                                                  | 1    | Identify the study as an economic evaluation                                                                        | Title page                                                             |
| Abstract                                               | 2    | Provide a structured summary of objectives, perspective, setting, methods, results, and conclusions                 | Abstract                                                               |
| <b>Introduction</b>                                    |      |                                                                                                                     |                                                                        |
| Background and objectives                              | 3    | Provide an explicit statement of the broader context for the study                                                  | Introduction – Page 3                                                  |
| <b>Methods</b>                                         |      |                                                                                                                     |                                                                        |
| Target population and subgroups                        | 4    | Describe characteristics of the base case population and subgroups analysed, including why they were chosen         | Krebs et al. (2019)[6] – Page 4 (Paragraph 3)                          |
| Setting and location                                   | 5    | State relevant aspects of the system in which decisions need to be made                                             | Methods – Page 5 (Paragraph 1)                                         |
| Study perspective                                      | 6    | Describe the perspective of the study and relate this to the costs being evaluated                                  | Methods – Page 8 (Paragraph 2)                                         |
| Comparators                                            | 7    | Describe the interventions or strategies being compared and state why they were chosen                              | Methods – Page 7/8 (Paragraph 2-4)                                     |
| Time horizon                                           | 8    | State the time horizons over which costs and consequences are being evaluated                                       | Methods – Page 8 (Paragraph 2)                                         |
| Discount rate                                          | 9    | Report/explain the choice of discount rate used for costs and outcomes                                              | Methods – Page 8 (Paragraph 2)                                         |
| Choice of health outcomes                              | 10   | Describe what outcomes were used as the measure of benefit in the evaluation and their relevance for the analysis   | Methods – Page 8 (Paragraph 2)                                         |
| Measurement of effectiveness                           | 11   | Describe fully the methods used for identification of included studies and synthesis of clinical effectiveness data | Krebs et al. (2019)[6] – S1 Supplement Table B2 & Pg. 23-32            |
| Measurement and valuation of preference based outcomes | 12   | If applicable, describe the population and methods used to elicit preferences for outcomes                          | Krebs et al. (2019)[6] – S1 Supplement Page 49 (Section 6)             |
| Estimating resources and costs                         | 13   | Describe approaches and data sources used to estimate resource use associated with model health states              | Krebs et al. (2019)[6] – Page 11 (Paragraph 9), Krebs et al. (2019)[7] |
| Currency, price date and conversion                    | 14   | Report the dates of the estimated resource quantities and unit costs                                                | Methods – Page 8 (Paragraph 2)                                         |
| Choice of model                                        | 15   | Describe and give reasons for the specific type of decision-analytical model used                                   | Zang et al. (2019)[9] – Methods (2.1.1 Model construction)             |

|                                                                |    |                                                                                                                                                                      |                                                                                |
|----------------------------------------------------------------|----|----------------------------------------------------------------------------------------------------------------------------------------------------------------------|--------------------------------------------------------------------------------|
| Assumptions                                                    | 16 | Describe all structural or other assumptions underpinning the decision-analytical model                                                                              | Zang et al. (2019)[9] – Methods (2.1 Model description)                        |
| Analytical methods                                             | 17 | Describe all analytical methods supporting the evaluation                                                                                                            | Krebs et al. (2019)[6] – S1 Supplement C                                       |
| <b>Results</b>                                                 |    |                                                                                                                                                                      |                                                                                |
| Study parameters                                               | 18 | Report the values, ranges, references, and probability distributions for all parameters                                                                              | Krebs et al. (2019)[6] – S1 Supplement C & S2 Supplement “Supplement C Tables” |
| Incremental costs and outcomes                                 | 19 | For each intervention, report mean values for the main categories of estimated costs and outcomes of interest, as well as mean differences between comparator groups | Krebs et al. (2019)[7]                                                         |
| Characterising uncertainty                                     | 20 | Describe the effects on the results of uncertainty for all input parameters and uncertainty related to the structure of the model and assumptions                    | Supplement Tables 1 & Figures 1-5                                              |
| Characterising heterogeneity                                   | 21 | If applicable, report differences in costs, outcomes, or cost-effectiveness that can be explained by variations between subgroups of patients                        | Discussion – Heterogeneity discussed throughout                                |
| <b>Discussion</b>                                              |    |                                                                                                                                                                      |                                                                                |
| Findings, limitations, generalisability, and current knowledge | 22 | Summarize key findings and describe how they support the conclusions reached, and limitations to generalisability                                                    | Discussion – Page 12 (Paragraph 1) & Page 15 (Paragraph 3)                     |
| <b>Other</b>                                                   |    |                                                                                                                                                                      |                                                                                |
| Source of funding                                              | 23 | Describe study funding and other non-monetary sources of support                                                                                                     | Acknowledgements                                                               |
| Conflicts of interest                                          | 24 | Describe any potential conflicts of interest                                                                                                                         | Declarations of interests                                                      |



## Impact inventory

| Sector                         | Type of Impact                                  | Perspective       |                                                                                 | Notes                                                                                                                      |
|--------------------------------|-------------------------------------------------|-------------------|---------------------------------------------------------------------------------|----------------------------------------------------------------------------------------------------------------------------|
|                                |                                                 | Third-Party Payer | Societal                                                                        |                                                                                                                            |
| <b>Formal Health Care</b>      |                                                 |                   |                                                                                 |                                                                                                                            |
| Health                         | <b>Health Outcomes (Effects)</b>                |                   |                                                                                 |                                                                                                                            |
|                                | Longevity                                       | √                 |                                                                                 | Longevity effects captured through QALYs until individuals age-out at 65 years                                             |
|                                | HRQoL                                           | √                 |                                                                                 | Longevity and HRQoL captured in QALYs                                                                                      |
|                                | Other Health Effects                            | √                 |                                                                                 | Incident HIV infections                                                                                                    |
|                                | <b>Medical Costs</b>                            |                   |                                                                                 |                                                                                                                            |
|                                | Third-Party Payers                              | √                 |                                                                                 | Percentage of health resource use costs + all intervention-related costs (i.e. all incremental costs above the status quo) |
|                                | Patients out-of-pocket                          | √                 |                                                                                 | Percentage of health resource use costs in status quo                                                                      |
|                                | Future related medical costs                    | √                 |                                                                                 | Captured in health resource use costs for status quo and intervention scenarios                                            |
| Future unrelated medical costs | √                                               |                   | Captured in background health resource use costs among HIV-negative individuals |                                                                                                                            |
| <b>Informal Health Care</b>    |                                                 |                   |                                                                                 |                                                                                                                            |
| Health                         | Patient-time costs                              | N/A               |                                                                                 |                                                                                                                            |
|                                | Unpaid caregiver-time costs                     | N/A               |                                                                                 |                                                                                                                            |
|                                | Transportation costs                            | N/A               |                                                                                 |                                                                                                                            |
| <b>Non-Health Care Sectors</b> |                                                 |                   |                                                                                 |                                                                                                                            |
| Productivity                   | Labour market earnings lost                     | N/A               |                                                                                 |                                                                                                                            |
|                                | Cost of unpaid lost productivity                | N/A               |                                                                                 |                                                                                                                            |
|                                | Cost of uncompensated household production      | N/A               |                                                                                 |                                                                                                                            |
| Consumption                    | Future consumption unrelated to health          | N/A               |                                                                                 |                                                                                                                            |
| Social Services                | Cost of social services related to intervention | N/A               |                                                                                 |                                                                                                                            |
| Legal or criminal justice      | Number of crimes related to intervention        | N/A               |                                                                                 |                                                                                                                            |
|                                | Cost of crimes related to intervention          | N/A               |                                                                                 |                                                                                                                            |
| Education                      | Impact on educational achievement               | N/A               |                                                                                 |                                                                                                                            |
| Housing                        | Cost of intervention on home improvements       | N/A               |                                                                                 |                                                                                                                            |
| Environment                    | Production of toxic waste by intervention       | N/A               |                                                                                 |                                                                                                                            |
| Other                          | Other impacts                                   | N/A               |                                                                                 |                                                                                                                            |

HRQoL – Health-related quality of life; QALY – Quality adjusted life-year

## References

1. Pearce L, Min J, Piske M, et al. Mortality among a population-based cohort of treated people with opioid use disorder during a public health emergency on opioid overdose in British Columbia, Canada. In: Society for Epidemiologic Research (SER). (Minneapolis, Minnesota, USA).
2. Centers for Disease Control and Prevention (CDC). Reported Law Enforcement Encounters Testing Positive for Fentanyl Increase Across US: 2015 Fentanyl Encounters Rate. Available at: <https://www.cdc.gov/drugoverdose/data/fentanyl-le-reports.html> [Accessed July 16, 2019].
3. Department of Health and Human Services. News Release: Trump Administration Secures Historic Donation of Billions of Dollars in HIV Prevention Drugs. Available at: <https://www.hiv.gov/blog/news-release-trump-administration-secures-historic-donation-billions-dollars-hiv-prevention>]. Accessed May 9, 2019.
4. The Lancet HIV. Are 2 million bottles of PrEP an empty gesture? *The Lancet HIV* **2019**; 6:e483.
5. Enns B, Krebs E, Mathews WC, et al. Heterogeneity in the costs of medical care among people living with HIV/AIDS in the United States. *Aids* **2019**; 33:1491-500.
6. Krebs E, Enns B, Wang L, et al. Developing a dynamic HIV transmission model for 6 U.S. cities: An evidence synthesis. *PLOS ONE* **2019**; 14:e0217559.
7. Krebs E, Zang X, Enns B, et al. The impact of localized implementation: determining the cost-effectiveness of HIV prevention and care interventions delivered at plausible scale across six U.S. cities. *AIDS* **2019**; 2nd Review.
8. Wang L, Krebs E, Min JE, et al. Combined estimation of disease progression and retention on antiretroviral therapy among treated individuals with HIV in the USA: a modelling study. *The Lancet HIV* **2019**; 6:e531-e9.
9. Zang X, Krebs E, Min J, et al. Development and calibration of a dynamic HIV transmission model for 6 US cities. *Medical Decision Making* **2019**; In Press.
10. Nosyk B, Zang X, Krebs E, et al. Ending the epidemic in America will not happen if the status quo continues: modeled projections for HIV incidence in 6 US cities. *Clin Infect Dis* **2019**; <https://doi.org/10.1093/cid/ciz1015>.
11. Sanders GD, Neumann PJ, Basu A, et al. Recommendations for conduct, methodological practices, and reporting of cost-effectiveness analyses: Second Panel on Cost-Effectiveness in Health and Medicine. *JAMA* **2016**; 316:1093.
12. Aspinall EJ, Nambiar D, Goldberg DJ, et al. Are needle and syringe programmes associated with a reduction in HIV transmission among people who inject drugs: a systematic review and meta-analysis. *Int J Epidemiol* **2014**; 18:2144-55.

13. Georgia Health News. Injectable drugs can kill, but clean syringes can save lives. Available at: <http://www.georgiahealthnews.com/2017/01/injectable-drugs-kill-clean-syringes-save-lives/> [Accessed: January 24, 2018].
14. City of Baltimore. Baltimore City Syringe Exchange Program. Available at: <http://www.aacounty.org/boards-and-commissions/HIV-AIDS-commission/presentations/BCHD%20Needle%20Exchange%20Presentation9.7.16.pdf> [Accessed: January 24, 2018].
15. City of Los Angeles. AIDS Coordinator's Office. Available at: <http://lacityaids.org/contact.html> [Accessed: January 25, 2018].
16. Centers for Disease Control and Prevention. Syringe Service Programs for Persons Who Inject Drugs in Urban, Suburban, and Rural Areas — United States, 2013. Available at: [https://www.cdc.gov/mmwr/preview/mmwrhtml/mm6448a3.htm?s\\_cid=mm6448a3\\_w](https://www.cdc.gov/mmwr/preview/mmwrhtml/mm6448a3.htm?s_cid=mm6448a3_w), [Accessed: February 4, 2018].
17. New York State Department of Health AIDS Institute. Comprehensive Harm Reduction Reverses the Trend in New HIV Infections. Available at: [https://www.health.ny.gov/diseases/aids/providers/reports/docs/sep\\_report.pdf](https://www.health.ny.gov/diseases/aids/providers/reports/docs/sep_report.pdf), [Accessed: February 4, 2018].
18. Public Health - Seattle & King County. HIV/STD program. Available at: <http://www.kingcounty.gov/depts/health/communicable-diseases/hiv-std.aspx>].
19. World Health Organization. WHO, UNODC, UNAIDS technical guide for countries to set targets for universal access to HIV prevention, treatment and care for injecting drug users—2012 revision. **2012**.
20. Teshale E, Asher A, Aslam M, et al. Estimated cost of comprehensive syringe service program in the United States. *PLoS one* **2019**; 14:e0216205-e.
21. Degenhardt L, Peacock A, Colledge S, et al. Global prevalence of injecting drug use and sociodemographic characteristics and prevalence of HIV, HBV, and HCV in people who inject drugs: a multistage systematic review. *The Lancet Global Health* **2017**; 5:e1192-e207.
22. MacArthur GJ, Minozzi S, Martin N, et al. Opiate substitution treatment and HIV transmission in people who inject drugs: systematic review and meta-analysis. *Bmj* **2012**; 345:e5945.
23. Nosyk B, Min JE, Evans E, et al. The effects of Opioid Substitution Treatment and Highly Active Antiretroviral Therapy on the cause-specific risk of mortality among HIV-positive people who inject drugs. *Clin Infect Dis* **2015**; 61:1157-65.
24. Song DL, Altice FL, Copenhaver MM, Long EF. Cost-effectiveness analysis of brief and expanded evidence-based risk reduction interventions for HIV-infected people who inject drugs in the United States. *PLoS One* **2015**; 10:e0116694.

25. Low AJ, Mburu G, Welton NJ, et al. Impact of Opioid Substitution Therapy on Antiretroviral Therapy Outcomes: A Systematic Review and Meta-Analysis. *Clin Infect Dis* **2016**; 63:1094-104.
26. Blanco C, Volkow ND. Management of opioid use disorder in the USA: present status and future directions. *The Lancet* **2019**.
27. Substance Abuse and Mental Health Services Administration. Treatment Episode Data Set (TEDS). Available at: <https://www.dasis.samhsa.gov/dasis2/teds.htm> [Accessed: January 24, 2018].
28. Jones CM, Campopiano M, Baldwin G, McCance-Katz E. National and state treatment need and capacity for opioid agonist medication-assisted treatment. *American journal of public health* **2015**; 105:e55-e63.
29. Anderson PL, Glidden DV, Liu A, et al. Emtricitabine-Tenofovir Concentrations and Pre-Exposure Prophylaxis Efficacy in Men Who Have Sex with Men. *Sci Transl Med* **2012**; 4:151ra25.
30. Liu AY, Cohen SE, Vittinghoff E, et al. Preexposure Prophylaxis for HIV Infection Integrated With Municipal- and Community-Based Sexual Health Services. *JAMA Intern Med* **2016**; 176:75-84.
31. Centers for Disease Control and Prevention. Preexposure Prophylaxis for the prevention of HIV infection in the United States, **2014**.
32. Bernard CL, Brandeau ML, Humphreys K, et al. Cost-Effectiveness of HIV Preexposure Prophylaxis for People Who Inject Drugs in the United States. *Annals of Internal Medicine* **2016**; 26:M15-2634.
